1     **Decision Tree Ensembles Utilizing Multivariate Splits Are Effective at Investigating Beta-**  
2                     **Diversity in Medically Relevant 16S Amplicon Sequencing Data**

3                     Josip Rudar<sup>1</sup>, G. Brian Golding<sup>2</sup>, Stefan C. Kremer<sup>3</sup>, Mehrdad Hajibabaei<sup>1</sup>

4

5     <sup>1</sup> Department of Integrative Biology & Centre for Biodiversity Genomics, University of Guelph,  
6     50 Stone Road East, Guelph, ON, N1G 2W1, Canada

7     <sup>2</sup> Department of Biology, McMaster University, 1280 Main St. West, Hamilton, ON, L8S 4K1,  
8     Canada

9     <sup>3</sup> School of Computer Science, University of Guelph, 50 Stone Road East, Guelph, ON, N1G  
10    2W1, Canada

11

12

13

14    Corresponding author info:

15    Josip Rudar – [joe.rudar@gmail.com](mailto:joe.rudar@gmail.com)

16    Mehrdad Hajibabaei – [mhajibab@uoguelph.ca](mailto:mhajibab@uoguelph.ca)

17

18

## 19 **Abstract**

20 Canonical distance and dissimilarity measures can fail to capture important relationships  
21 in high-throughput sequencing datasets since these measurements are unable to represent feature  
22 interactions. By learning a dissimilarity using decision tree ensembles, we can avoid this  
23 important pitfall. We used 16S rRNA data from the lumen and mucosa of the distal and proximal  
24 human colon and the stool of patients suffering from immune-mediated inflammatory diseases  
25 and compared how well the Jaccard and Aitchison metrics preserve the pairwise relationships  
26 between samples to dissimilarities learned using Random Forests, Extremely Randomized Trees,  
27 and LANDMark. We found that dissimilarities learned by unsupervised LANDMark models  
28 were better at capturing differences between communities in each set dataset. For example,  
29 differences in the microbial communities of colon's distal lumen and mucosa were better  
30 reflected using LANDMark dissimilarity ( $p \leq 0.001$ ,  $R^2 = 0.476$ ) than using the Jaccard distance  
31 ( $p \leq 0.001$ ,  $R^2 = 0.313$ ) or Random Forest dissimilarity ( $p \leq 0.001$ ,  $R^2 = 0.237$ ). In addition,  
32 applying Uniform Manifold Approximation and Projection to dissimilarity matrices and  
33 transforming the result using principal components analysis created two-dimensional projections  
34 that captured the main axes of variation while also preserving the pairwise distances between  
35 samples (eg:  $\rho = 0.8804$ ,  $p \leq 0.001$  for the distal colon dissimilarities). Finally, supervised  
36 LANDMark models tend to outperform both Random Forest and Extremely Randomized Tree  
37 classifiers. Models employing multivariate splits can improve the analysis of complex high-  
38 throughput sequencing datasets. The improvements observed in this work likely result from the  
39 ability of these models to reduce noise from uninformative features. In an unsupervised setting,  
40 LANDMark models can preserve pairwise relationships between samples. When used in a

41 supervised manner, these methods tend to learn a decision boundary that is more reflective of the  
42 biological variation within the dataset.

### 43 **Author Summary**

44 Distance and dissimilarity measures are often used to investigate the structure of  
45 biological communities. However, our investigation into two commonly used distance measures,  
46 the Jaccard and Aitchison distances, demonstrates that these measures can fail to capture  
47 important relationships in microbiome communities. This is likely due to their inability to  
48 identify dependencies between features. For example, both the Jaccard and Aitchison metrics are  
49 unable to identify subsets of samples where the presence of one feature depends on another.  
50 Previous research has found that Random Forest embeddings can be used to create an alternative  
51 dissimilarity measure for dimensionality reduction in genomic datasets. We show that  
52 dissimilarities learned by decision tree ensembles, especially those using base-estimators capable  
53 of partitioning data using oblique and non-linear cuts, can be superior since these approaches  
54 naturally model these interactions.

### 55 **Keywords**

56 Metric learning, amplicon sequencing, 16S rRNA, metabarcoding, ordination, biomarker  
57 discovery, machine learning

### 58 **Introduction**

59 Biomarkers are objectively measurable characteristics of biological systems which can  
60 identify and provide evidence in favor or against a biological process or condition (1,2). For  
61 example, organisms that are present or absent in patients suffering from a disease, such as  
62 Crohn's Disease, could be considered a biomarker if they can be used to predict the condition

63 (3). Machine learning (ML) algorithms are being increasingly applied to a wide array of  
64 genomic, metagenomic, and transcriptomic data sets to identify relevant biomarkers and create  
65 predictive models of these datasets. When analyzing amplicon sequencing data one typical goal  
66 is to discover amplicon sequence variants (ASVs) associated with each of the biological  
67 communities being studied. For example, a recent study identified how impaired dopamine  
68 signaling in mice with a defective dopamine transporter gene alters the activity of metabolic  
69 pathways and the composition of the gut microbiome (4). Unlike approaches such as DESeq2  
70 and MetagenomeSeq, ML models tend not to assume anything about the underlying distribution  
71 of each co-variate (5,6). Furthermore, many ML models, such as neural networks and Random  
72 Forests, can naturally model interactions between covariates (7,8). For these reasons, ML  
73 represents a potentially powerful way to identify biomarkers in high-throughput sequencing  
74 (HTS) data. Out of the myriad of available machine learning methods, Random Forests (RFs)  
75 and other decision tree ensembles have become very popular due to their good overall  
76 performance when working with high-throughput sequencing data. Furthermore, extensive tools  
77 and approaches have been designed which are starting to peel back the “black-box” veneer of  
78 these and other machine learning models (9). For example, RFs have been recently applied to  
79 study and identify operational taxonomic units (OTU), which can be considered a class of  
80 biomarkers, from the microbiomes of patients suffering from cardiovascular disease, chronic  
81 obstructive pulmonary disease, and various immune-mediated inflammatory diseases (3,10,11).  
82 These models, which are not linearly constrained, have been shown to generalize well to unseen  
83 data in more recent amplicon sequencing studies (12).

84           While machine learning has become incredibly popular and has led to important  
85 discoveries, biomarker selection using RFs and other commonly used approaches can be

86 problematic due to the various algorithmic assumptions. For example, each decision tree in a RF  
87 uses a recursive series of axis-orthogonal splits to approximate the underlying data generating  
88 function (13,14). However, more complex oblique or non-linear splits often result in more  
89 appropriate representations of the data generating function (12,14). Another classification  
90 algorithm, k-nearest neighbors, is sensitive to the number of neighbors and the distance metric  
91 (15). Logistic regression, ridge regression, and linear support vector classifiers can only learn  
92 linear decision boundaries (12). while neural networks can require a large amount of data and  
93 time to learn appropriate weights for each parameter.

94         One aspect of RFs which have not been extensively explored is their ability to learn a  
95 dissimilarity measure when working in an unsupervised setting. Unsupervised RFs have  
96 previously been used to discover similar cell populations in single-cell RNAseq data, identify  
97 different classes of renal cell carcinomas tumors, study the underlying structure of a population  
98 using shared genetic variations (16–18). This body of work has demonstrated that unsupervised  
99 RFs can identify important sources of variation between samples while still being robust to noise  
100 and problems stemming from the high dimensionality of high-throughput sequencing datasets.  
101 While these results lay the groundwork and demonstrate the utility of unsupervised RFs, they do  
102 not investigate the potential of multivariate decision trees in learning a similarity function. In this  
103 study, we investigate multivariate decision trees. Specifically, we will investigate their ability to  
104 learn a similarity measure and how this similarity measure compares with distance measures.  
105 Finally, we will examine how successful multivariate trees are at classifying and identifying  
106 biomarkers in two medically important human microbiome datasets.

## 107 **Methods**

### 108 *Dataset Selection*

109 Two human microbiome datasets were selected for inclusion in this study. The first was  
110 derived from the colons of healthy individuals (19) using 16S rRNA amplicon sequencing. This  
111 dataset collected samples from the unprepared colons of healthy individuals and was chosen  
112 since we could divide the dataset into four sets of comparisons (19). These comparisons  
113 examined differences in the abundance of OTUs between the microbial communities of the  
114 proximal lumen (RS) and mucosa (RB), the distal lumen (LS) and mucosa (LB), between the RS  
115 and the LS, and finally between the RB and the LB. The second dataset was chosen since it  
116 contains samples from patients who suffer from immune-mediated inflammatory diseases  
117 (IMID) (3). Differences between the microbiomes of patients suffering from Chron's disease  
118 (CD), ulcerative colitis (UC), multiple sclerosis (MS), and rheumatoid arthritis (RA) were  
119 compared to healthy controls. Specifically, the work by Forbes et al. (2018) investigated if  
120 disease-specific taxonomic biomarkers, OTUs, could be identified in each patient's stool. In both  
121 studies, the authors used differential abundance testing and Random Forests to identify potential  
122 OTU biomarkers (3,13).

### 123 ***Bioinformatic Processing of Raw Reads***

124 Raw sequences from two previously published datasets were obtained from the Sequence  
125 Read Archive (PRJNA450340 and PRJNA418115) (3,19). All bioinformatic processing of the raw  
126 reads was prepared using the MetaWorks v1.8.0 pipeline (available online at:  
127 <https://github.com/terrimporter/MetaWorks>) (20). The default settings for merging reads were  
128 used except for the parameter controlling the minimum fraction of matching bases, which was  
129 increased from 0.90 to 0.95. This was done to remove a larger fraction of potentially erroneous  
130 reads. Merged reads were then trimmed using the default settings MetaWorks passes to  
131 CutAdapt. Since reads from PRJNA418115 were pre-processed and the primers removed

132 (Personal Communication with Kaitlin Flynn, Ph.D. ([kjflynn06@gmail.com](mailto:kjflynn06@gmail.com)) in January 2019),  
133 no reads were discarded during trimming. The remaining quality-controlled sequences were then  
134 de-replicated and denoised using VSEARCH 2.15.2 to remove putative chimeric sequences (21).  
135 Finally, VSEARCH was used to construct a matrix where each row is a sample and each column  
136 an Amplicon Sequence Variant (ASV). Taxonomic assignment was conducted using the RDP  
137 Classifier (version 2.13) and the built-in reference set (22).

138 ASVs which are likely to be contaminants, specifically those likely belonging to  
139 chloroplasts and mitochondria, were removed. From the remaining sequences, only those  
140 belonging to the domain *Bacteria* and *Archaea* were retained for further analysis. In the IMID  
141 dataset, only sequences assigned to *Firmicutes*, *Actinobacteria*, and *Tenericutes* were retained.  
142 This was done since the original study found that operational taxonomic units assigned to other  
143 bacterial groups were underrepresented (3). Following the initial processing steps, ASVs with a  
144 bootstrap support of 0.8 or higher were chosen for further analysis. The cutoff of 0.8 for the V4  
145 rRNA region sequenced in the 16S dataset was chosen because fragments of ~ 200 bp in length  
146 are likely to be assigned to the correct genus 95.7% of the time (23). A site by ASV count  
147 matrix, where each row is a sample and each column an ASV, was created using this data. The  
148 matrix was filtered to retain only ASVs found in three or more samples. This filtration step was  
149 taken since reducing the size of the feature space can often lead to a more generalizable model  
150 (24–26).

151 The filtered matrix must be transformed in such a way to minimize the impact of various  
152 technical factors, such as differences in library size (27). Our unsupervised and supervised  
153 analyses examined two transformations of the filtered matrix. The first transformation we  
154 investigated was the presence-absence transformation. This transformation is useful since it

155 reflects if ASVs are present or absent in the sample and the impact of technical errors, such as  
156 differences in library size and the uneven amplification of DNA can be minimized. The second  
157 transformation, the centered-log-ratio (CLR) transformation, was used since it effectively  
158 addresses the fact that amplicon-sequencing data is compositional (24,28). independent. When  
159 searching for biomarkers, the transformation which resulted in the best generalization  
160 performance was used.

### 161 *Training of Unsupervised Models*

162 Tree-based models are an effective means of capturing the similarity between samples.  
163 The similarity matrix,  $S$ , can be constructed by calculating how often samples co-occur in the  
164 terminal leaves of each decision tree. This co-occurrence,  $S(x_i, x_j)$ , is a similarity and can be  
165 found using the following equation:

$$166 \text{ Equation One: } S(x_i, x_j) = \frac{x_i x_j^T}{N}$$

167 Where  $x_i$  and  $x_j$  is the vector representation of all terminal node positions of samples  $x_i$  and  $x_j$  in  
168 the forest, and  $N$  is the total number of trees in the forest. The similarity matrix,  $S$ , is then  
169 converted into a dissimilarity matrix,  $D$  (Equation Two) (17). This dissimilarity measure, while  
170 not a metric such as the Jaccard distance (29), can be used to investigate beta-diversity and can  
171 be constructed using either a supervised or an unsupervised approach (17).

$$172 \text{ Equation Two: } D = \sqrt{1 - S}$$

173 To use decision tree ensembles in an unsupervised manner a second dataset is created  
174 such that the columns (ASVs) are randomly permuted. In the case of the CLR-transformed data,  
175 the original counts were permuted before the CLR transformation. The samples in the permuted



176 dataset are assigned a label of “0” while samples in the original dataset are assigned a label of  
177 “1”. The classifier  $s$  is then tasked to find the difference between the permuted and original data.  
178 RF and ET classifiers were used at their default settings, except for the number of trees which  
179 was set to 128 (30). LANDMark (Oracle) models were trained using 128 trees and with the  
180 number of features set to  $\sqrt{n}$ , where  $n$  is the number of features in the filtered dataset. This was  
181 done to generate a more diverse set of trees. To avoid generating proximity matrices that are  
182 biased due to a lucky permutation, we created 100 different unsupervised proximity matrices  
183 using equation one and combined them using equation two to create a dissimilarity matrix.

#### 184 *Analysis of Beta-Diversity*

185 Dissimilarity and distance matrices were used as input for PerMANOVA and a principal  
186 coordinates analysis (PCoA). A Uniform Manifold Approximation and Projection (UMAP) using  
187 the dissimilarity and distance matrices was also conducted (31). The UMAP algorithm was  
188 chosen since it projects a high-dimensional graph of the input data into a lower-dimensional  
189 Euclidean space. This algorithm can create potentially better representations of the sampling  
190 space since high-throughput sequencing data can lie on a complex high-dimensional manifold  
191 (31). Finally, the pairwise distances between samples in the UMAP embedding were calculated  
192 and used by PCoA to embed the UMAP projection into a two-dimensional space (32).  
193 Spearman’s rho was used to measure the distortion between the embeddings and the original  
194 distances/dissimilarities.

#### 195 *Assessment of Supervised Model Generalization Performance*

196 Following our investigation of beta-diversity using similarity measures derived from  
197 unsupervised models, we assessed the generalization and feature selection performance of the

198 LANDMark (Oracle), ET, and RF classifiers (33,34). Thirty different train-test splits, with the  
199 classes in each set being proportional to those in the original, were created for each  
200 metabarcoding data set. 50% of the original data was used to construct each training set and the  
201 random state used to create each train-test split was set to the iteration number for the split for  
202 reproducibility. RF and ET classifiers were used at their default settings, apart from the number  
203 of trees which was set to 128 (30). LANDMark (Oracle) models were also trained using 128  
204 trees and, as in the unsupervised learning, the number of features considered at each node was set  
205 to  $\sqrt{n}$ . The remaining 50% of the data were used to calculate the balanced accuracy score using  
206 Scikit-Learn (33). This process was repeated for presence-absence and CLR-transformed data.  
207 Unless otherwise stated, the analysis of the IMID data was conducted using the first time point.  
208 This was done to avoid inflating the balanced accuracy scores since the microbiomes across time  
209 were found to be highly similar.

210         The transform (presence-absence or CLR) resulting in the best generalization  
211 performance and was used during feature selection. ASV features were selected using a  
212 combination of recursive feature elimination (RFE) followed by RFE with 5-fold stratified cross-  
213 validation. RFE was used to find a set of 200 predictive features. This step aimed to remove  
214 ASVs with little predictive value. Following this, RFE with 5-fold stratified cross-validation was  
215 used to create a more distilled subset of at least 20 predictive ASVs. The step size for each round  
216 of feature elimination was set to 5%. Each iteration's test set was used to evaluate the predictive  
217 balanced accuracy of the final model. The subsets of ASVs from the best performing iteration  
218 were chosen for further analysis and display. Shapley scores, calculated using the 'Explainer'  
219 function of the Python 'shap' package was used to identify the ASVs which strongly impacted  
220 the prediction of each sample (35). The 'shap' package was also used to generate decision

221 heatmaps which display the impact on prediction for each ASV. When this process was used to  
222 analyze IMID data only samples from the first time point were used as input into RFE. However,  
223 Shapley scores were calculated twice. The first set of scores was calculated using each iteration's  
224 test data. The second set of scores was calculated using the first time point as the background  
225 dataset and the second time point as the testing data. A Bayesian analysis, using Nadeau and  
226 Bengio's corrected t-test implemented in the Python 'baycomp' package, was used to compare  
227 the generalization performance of models before feature selection and after feature selection  
228 (36). The region of practical equivalence (ROPE), the probability of two models having  
229 equivalent performance, was defined as a difference in score within  $\pm 0.025$ . Although the choice  
230 for the size of this region is arbitrary, this size was chosen since it represents the impact of two  
231 classification errors. Finally, the structure of the decision space will be investigated to ascertain  
232 how well each model learns an appropriate decision boundary (14,37).

## 233 **Results**

### 234 *The Choice of Transformation and Dissimilarity Measure Can Result in Different*

### 235 *Interpretations of Amplicon Sequencing Data*

236 When LANDMark (Oracle), ET, and RF classifiers were trained to differentiate between  
237 real and randomized samples, statistically significant differences between sampling locations  
238 were detected when using each model's dissimilarity matrix (Table 1). These tests demonstrated  
239 that the most suitable choice of transformation depends on the dataset. For example, the main  
240 effect (sampling location) clearly explained a greater fraction of the variance when using the  
241 presence-absence transformation in each subset of the healthy gut data. For the IMID data, the  
242 CLR transformation was the better choice. These tests also demonstrate that unsupervised  
243 models, such as LANDMark (Oracle), can capture information that distinguishes samples,

244 especially when trained using appropriately transformed data. To test if the number of features  
245 used has an impact on the explanatory ability of the main effect, we created multiple  
246 dissimilarity matrices where the number of features considered at each node was  $N$ ,  $2N$ ,  $4N$ ,  $8N$ ,  
247 and  $16N$ . Here  $N$  is equal to the square root of the number of ASVs. This investigation revealed  
248 that the explanatory ability of the main effect in each dataset appears to be sensitive to the  
249 number of features explored at each node (Figure 1). Interestingly, there appears to be an inverse  
250 relationship between LANDMark and the RF and ET models. Finally, the amount of explained  
251 variance along the first principal coordinate tended to be greater when using LANDMark  
252 (Oracle) dissimilarities. The spread of samples along this axis also tended to reflect differences  
253 in sampling location/disease phenotype (Figures 2 and 3). These results are particularly  
254 surprising since these matrices were created without using any of the metadata.

255

256

257

258

259

260

261

262

263

264

265 **Table 1: PerMANOVA results for each transform on each subset of the healthy gut and**  
 266 **IMID data.** PerMANOVA results using the LANDMark dissimilarity measure are highlighted in  
 267 bold.

| <i>Dataset</i> | <i>Subset</i>                         | <i>Dissimilarity Measure</i> | <i>Presence – Absence</i> |                |                      | <i>Centered Log Ratio</i> |                |                      |              |
|----------------|---------------------------------------|------------------------------|---------------------------|----------------|----------------------|---------------------------|----------------|----------------------|--------------|
|                |                                       |                              | <i>Pseudo-F</i>           | <i>p-value</i> | <i>R<sup>2</sup></i> | <i>Pseudo-F</i>           | <i>p-value</i> | <i>R<sup>2</sup></i> |              |
| Healthy Gut    | LB-LS                                 | Distance                     | 4.05                      | 0.001          | 0.313                | 2.48                      | 0.001          | 0.146                |              |
|                |                                       | <b>LANDMark</b>              | <b>5.72</b>               | <b>0.001</b>   | <b>0.476</b>         | <b>2.50</b>               | <b>0.001</b>   | <b>0.147</b>         |              |
|                |                                       | Extra Trees                  | 3.26                      | 0.001          | 0.228                | 2.43                      | 0.001          | 0.141                |              |
|                | LB-RB                                 | Random Forest                | 3.35                      | 0.001          | 0.237                | 2.41                      | 0.001          | 0.139                |              |
|                |                                       | Distance                     | 2.31                      | 0.001          | 0.130                | 2.13                      | 0.001          | 0.113                |              |
|                |                                       | <b>LANDMark</b>              | <b>2.52</b>               | <b>0.001</b>   | <b>0.150</b>         | <b>2.12</b>               | <b>0.001</b>   | <b>0.111</b>         |              |
|                | RB-RS                                 | Extra Trees                  | 2.01                      | 0.003          | 0.101                | 1.74                      | 0.007          | 0.077                |              |
|                |                                       | Random Forest                | 2.03                      | 0.002          | 0.103                | 1.60                      | 0.011          | 0.066                |              |
|                |                                       | Distance                     | 1.68                      | 0.005          | 0.073                | 0.855                     | 0.785          | 0.020                |              |
|                | LS-RS                                 | <b>LANDMark</b>              | <b>1.93</b>               | <b>0.004</b>   | <b>0.094</b>         | <b>0.903</b>              | <b>0.708</b>   | <b>0.022</b>         |              |
|                |                                       | Extra Trees                  | 1.47                      | 0.013          | 0.056                | 1.21                      | 0.089          | 0.039                |              |
|                |                                       | Random Forest                | 1.51                      | 0.010          | 0.060                | 1.25                      | 0.072          | 0.042                |              |
|                | Immune Modulated Inflammatory Disease | CD-HC                        | Distance                  | 0.692          | 0.968                | 0.013                     | 0.460          | 0.999                | 0.006        |
|                |                                       |                              | <b>LANDMark</b>           | <b>0.760</b>   | <b>0.992</b>         | <b>0.016</b>              | <b>0.540</b>   | <b>1.0</b>           | <b>0.008</b> |
|                |                                       |                              | Extra Trees               | 0.819          | 0.946                | 0.018                     | 0.714          | 0.994                | 0.014        |
| MS-HC          |                                       | Random Forest                | 0.801                     | 0.950          | 0.018                | 0.836                     | 0.895          | 0.019                |              |
|                |                                       | Distance                     | 3.23                      | 0.001          | 0.220                | 5.61                      | 0.001          | 0.460                |              |
|                |                                       | <b>LANDMark</b>              | <b>4.03</b>               | <b>0.001</b>   | <b>0.305</b>         | <b>6.46</b>               | <b>0.001</b>   | <b>0.530</b>         |              |
| RA-HC          |                                       | Extra Trees                  | 4.49                      | 0.001          | 0.353                | 6.38                      | 0.001          | 0.523                |              |
|                |                                       | Random Forest                | 4.55                      | 0.001          | 0.359                | 4.66                      | 0.001          | 0.370                |              |
|                |                                       | Distance                     | 1.42                      | 0.028          | 0.049                | 2.12                      | 0.001          | 0.103                |              |
| UC-HC          |                                       | <b>LANDMark</b>              | <b>1.37</b>               | <b>0.071</b>   | <b>0.046</b>         | <b>1.93</b>               | <b>0.001</b>   | <b>0.087</b>         |              |
|                |                                       | Extra Trees                  | 1.46                      | 0.013          | 0.052                | 1.68                      | 0.001          | 0.067                |              |
|                |                                       | Random Forest                | 1.46                      | 0.021          | 0.052                | 1.55                      | 0.013          | 0.058                |              |
| UC-HC          |                                       | Distance                     | 1.69                      | 0.005          | 0.065                | 2.89                      | 0.001          | 0.169                |              |
|                |                                       | <b>LANDMark</b>              | <b>1.50</b>               | <b>0.027</b>   | <b>0.052</b>         | <b>2.74</b>               | <b>0.001</b>   | <b>0.155</b>         |              |
|                |                                       | Extra Trees                  | 1.49                      | 0.025          | 0.051                | 2.30                      | 0.001          | 0.114                |              |
| UC-HC          | Random Forest                         | 1.52                         | 0.011                     | 0.054          | 1.79                 | 0.001                     | 0.073          |                      |              |
|                | Distance                              | 1.47                         | 0.019                     | 0.053          | 2.15                 | 0.001                     | 0.106          |                      |              |
|                | <b>LANDMark</b>                       | <b>1.50</b>                  | <b>0.037</b>              | <b>0.054</b>   | <b>1.93</b>          | <b>0.001</b>              | <b>0.088</b>   |                      |              |
| UC-HC          | Extra Trees                           | 1.46                         | 0.015                     | 0.052          | 1.91                 | 0.001                     | 0.0086         |                      |              |
|                | Random Forest                         | 1.45                         | 0.02                      | 0.051          | 1.67                 | 0.003                     | 0.067          |                      |              |

268

269

270

271

272

273 **Figure 1: Distribution of the PerMANOVA effect sizes ( $R^2$ ) for each type of dissimilarity**  
274 **matrix.** Each learned dissimilarity matrix is constructed using an ensemble of decision trees. The  
275 internal nodes of each decision tree examine (or use in the case of LANDMark) a subset of all  
276 ASVs while Aitchison Distances were constructed using all ASVs. The minimum number of  
277 ASVs considered, N, is the square root of the total number of ASVs. This data was generated  
278 using the Crohn's Disease subset of the IMID data.

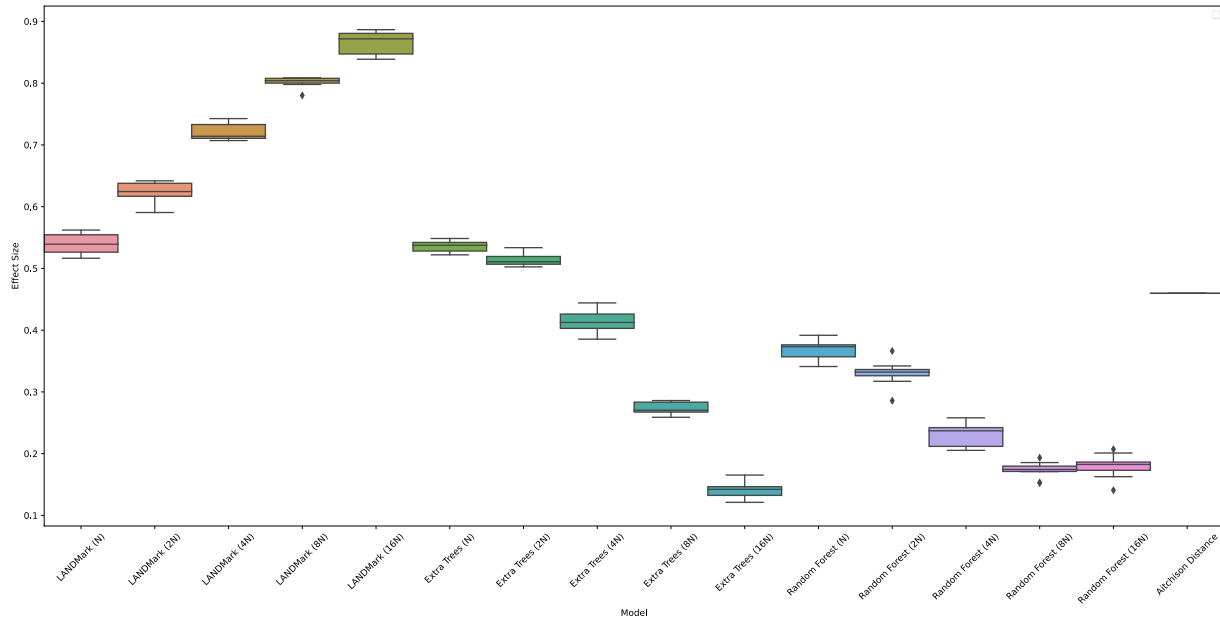

279  
280  
281  
282  
283  
284  
285  
286  
287  
288  
289  
290  
291  
292  
293  
294  
295  
296  
297  
298  
299  
300  
301  
302

303 **Figure 2: UMAP followed by PCoA and PCoA ordinations of the distal lumen and mucosa**  
304 **dataset.** When only using PCoA projections of distance and dissimilarity matrices, each axis  
305 explains only a fraction of the total variation in the dataset. However, projections of the UMAP  
306 space using PCoA are more informative. In these projections, the first PCoA axis explains the  
307 vast majority of the variation in the distance and dissimilarity matrices. Furthermore, in these  
308 projections, the variation along the first axis appears to be strongly related to differences in  
309 community structure. The coloring of points serves as a visual aid and it does not affect the  
310 result. LB are samples taken from the distal mucosa while LS are samples taken from the distal  
311 lumen.

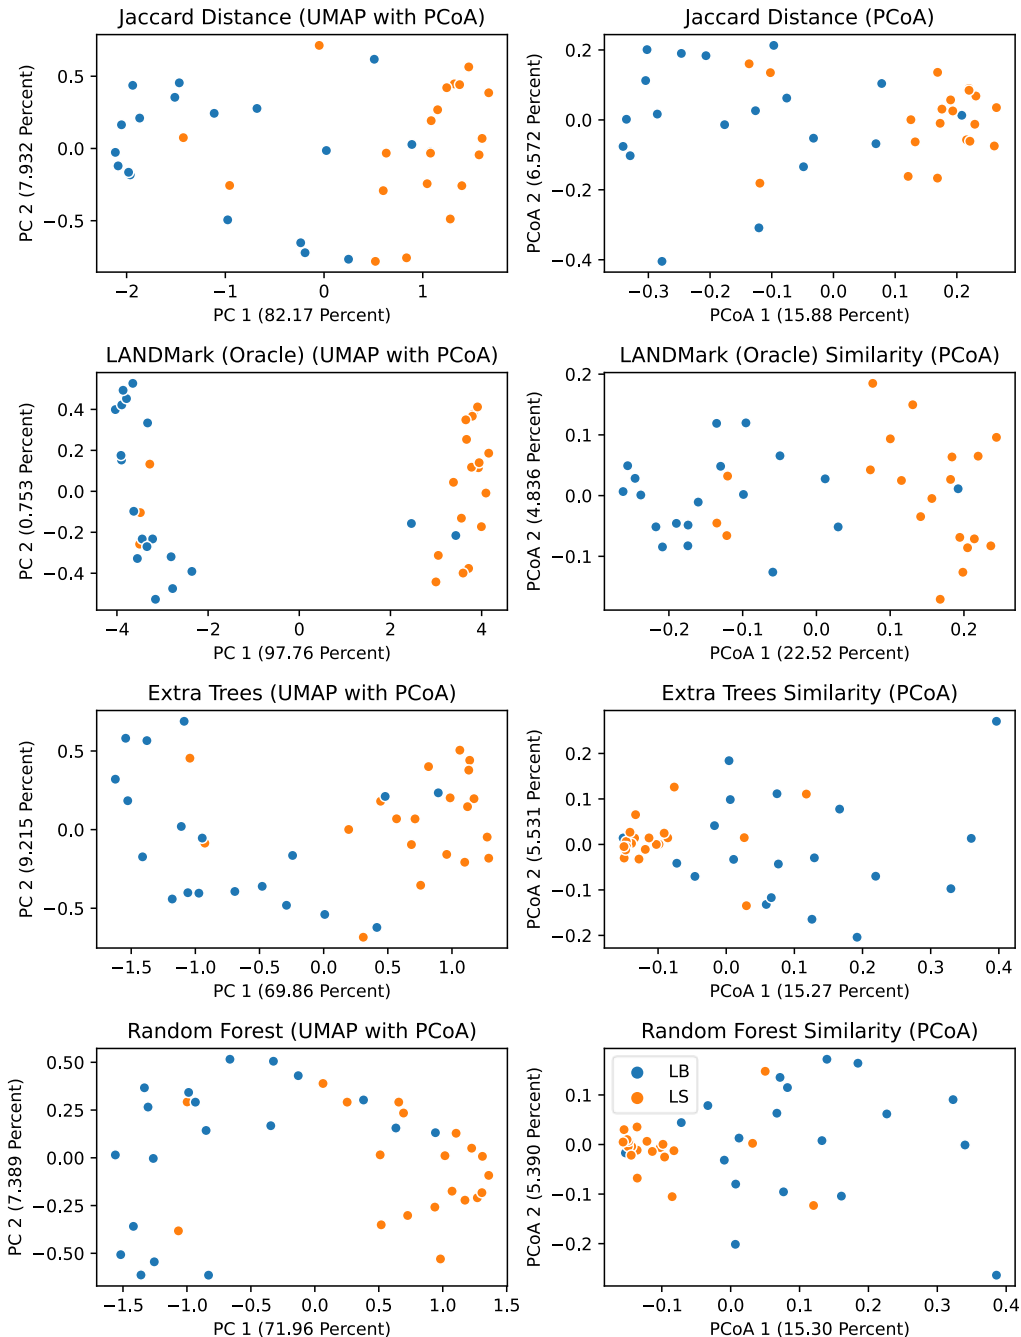

313 **Figure 3: UMAP followed by PCoA and PCoA ordinations of the Crohn's disease subset.**  
314 When only using PCoA projections of distance and dissimilarity matrices, each axis explains  
315 only a fraction of the total variation in the dataset. However, projections of the UMAP space  
316 using PCoA are more informative. In these projections, the first PCoA axis explains the vast  
317 majority of the variation in the distance and dissimilarity matrices. Furthermore, in these  
318 projections, the variation along the first axis appears to be strongly related to differences in  
319 community structure. The coloring of points serves as a visual aid and it does not affect the  
320 result. HC indicates healthy controls while CD indicates patients suffering from Crohn's Disease.

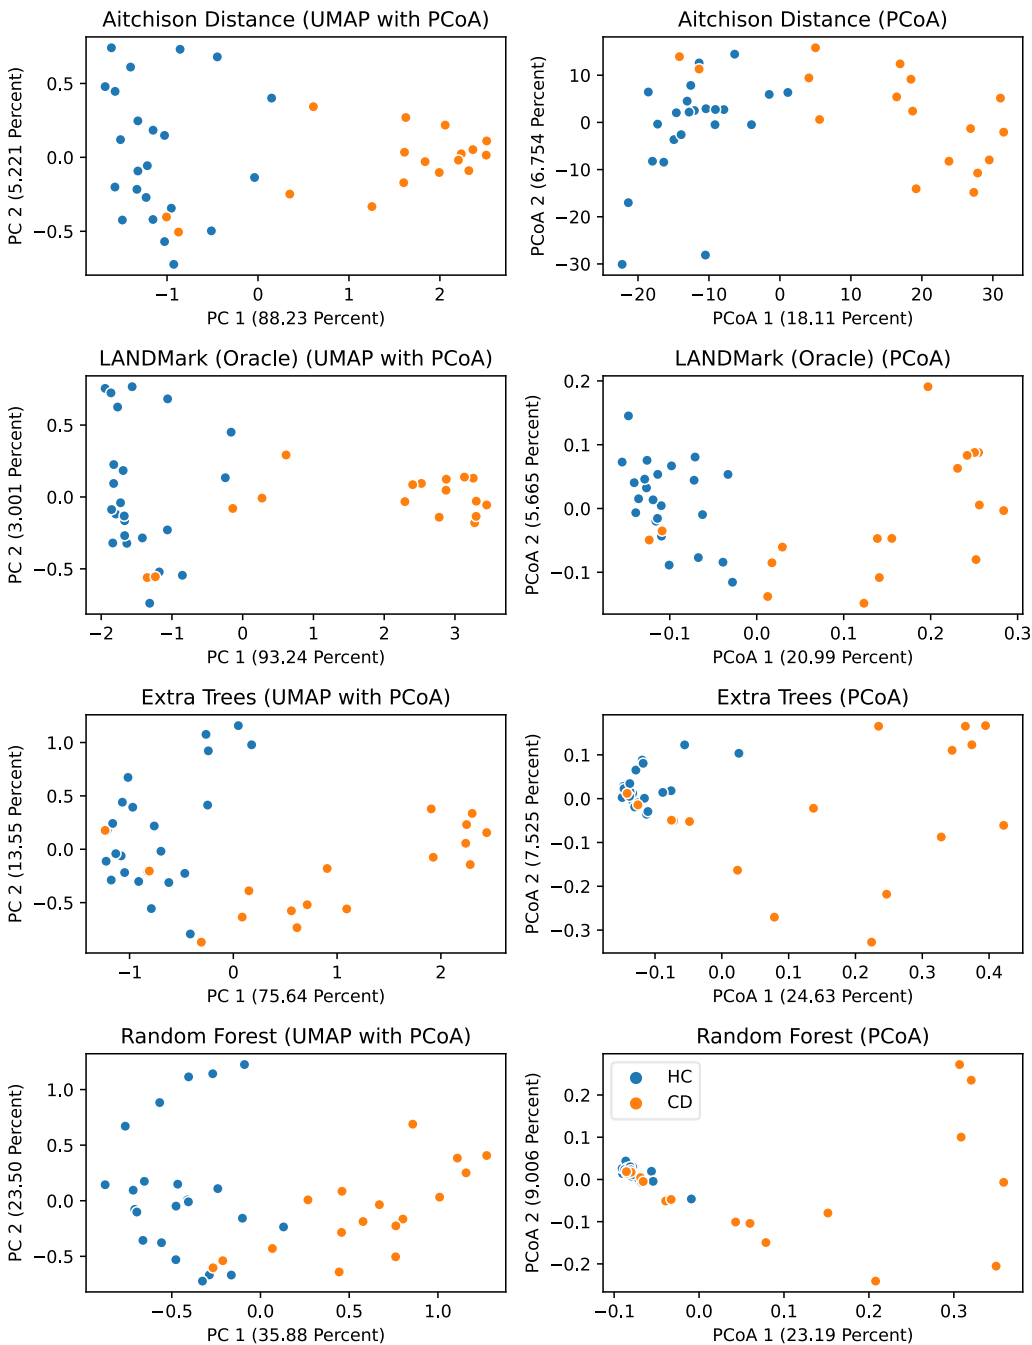



323 *UMAP followed by PCoA is Effective at Creating Ordinations of the Investigated 16S rRNA*

324 *Datasets*

325 In PCoA projections of the original dissimilarity matrices, little to no correlation between  
326 distances in the original and projected spaces was observed (Figures 4 and 5 A, D, G, J).  
327 However, there is a trend where the most dissimilar pairs of samples could be found on the right  
328 side of each PCoA plot. Projections of each original dissimilarity matrix by UMAP, however,  
329 appear to better reflect the topology of the input space since distances between samples in the  
330 original and projected space appear to be correlated (Figures 4 and 5 B, E, H, K). Simply, this  
331 means that if the distance between two samples was large in the original space it also tended to  
332 be large in the UMAP space. Furthermore, Spearman's rho tended to be highest in the UMAP  
333 projections of LANDMark (Oracle) dissimilarities, suggesting that this approach is particularly  
334 effective at preserving relationships between samples (Figure 4 and 5 E). In one dataset (LB vs  
335 LS), the projection of the samples, pairwise comparisons between samples from the original  
336 LANDMark (Oracle) dissimilarities the projected distances resulted in the formation of two  
337 distinct groups (Figure 1). This can be easily explained as inter-class variation being greater than  
338 the intra-class variation in this subset, an observation supported by the PerMANOVA results  
339 (See Table 1). This was also observed in other subsets, though not to such an extreme degree.  
340 Finally, unlike the PCoA projections of the original dissimilarities, a two-dimensional PCoA  
341 embedding of the UMAP distances does not result in a notable difference in the pairwise  
342 dissimilarities between samples (Figure 4 and 5 C, F, I, L).

343

344

345 **Figure 4: A visualization of how each type of projection preserves the pairwise distances**  
346 **between the projected and original distances in the LS-LB subset of the healthy gut data.**  
347 The coloring of points serves as a visual aid and it does not affect the result. The first row  
348 visualizes the pairwise relationships between projections of the Jaccard distances into the PCoA  
349 (A), UMAP (B), and UMAP followed by PCoA space (C). The meaning of columns is the same  
350 in subsequent rows. The second (D-F), third (G-I), and fourth (J-L) visualize how each  
351 projection preserves the pairwise distances when dissimilarity matrices are constructed using  
352 LANDMark (Oracle), Extremely Randomized Trees, and Random Forests, respectively.

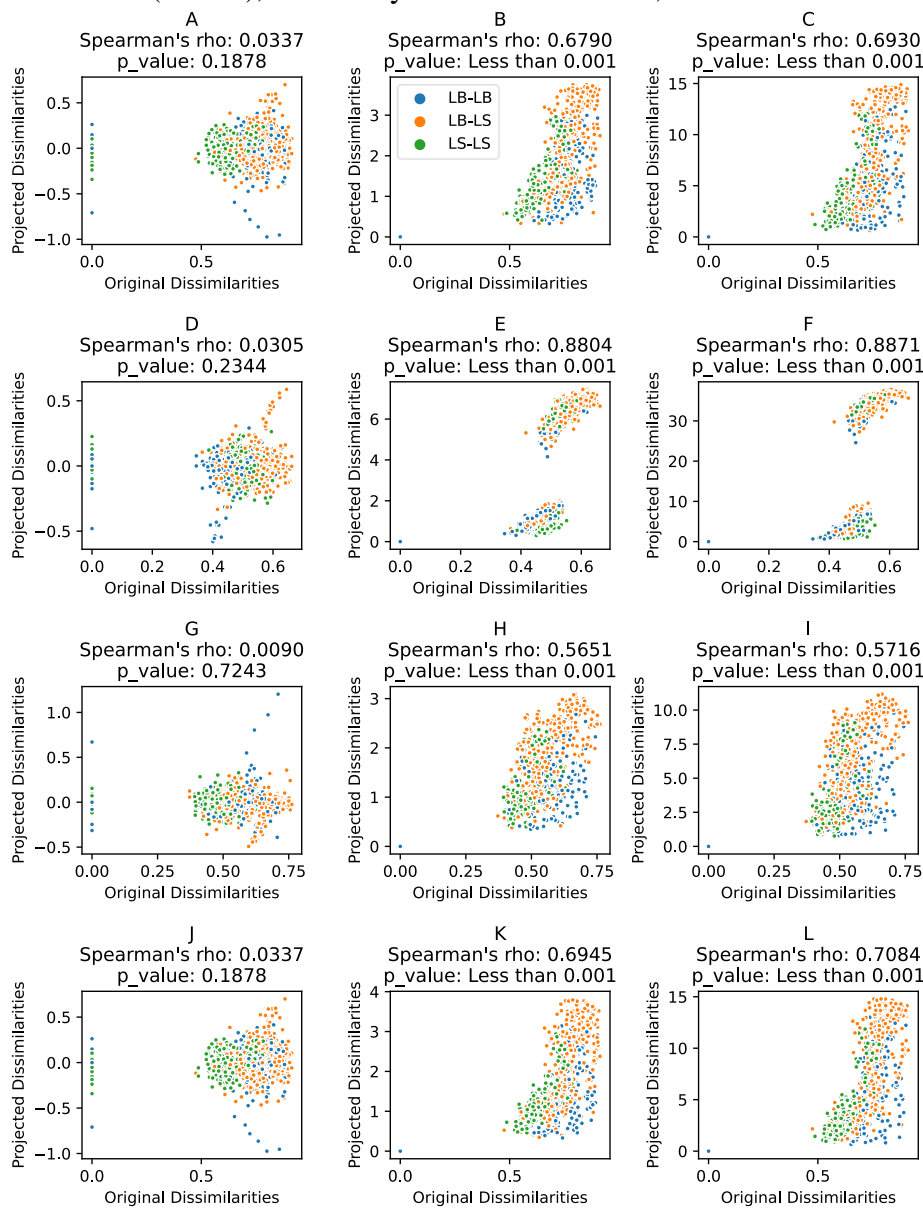

353  
354

355

356 **Figure 5: A visualization of how each type of projection preserves the pairwise distances**  
357 **between the projected and original distances in the Crohn's Disease subset of the IMID**  
358 **data.** The coloring of points serves as a visual aid and it does not affect the result. The first row  
359 visualizes the pairwise relationships between projections of the Aitchison distances into the  
360 PCoA (A), UMAP (B), and UMAP followed by PCoA space (C). The meaning of columns is the  
361 same in subsequent rows. The second (D-F), third (G-I), and fourth (J-L) visualize how each  
362 projection preserves the pairwise distances when dissimilarity matrices are constructed using  
363 LANDMark (Oracle), Extremely Randomized Trees, and Random Forests, respectively.

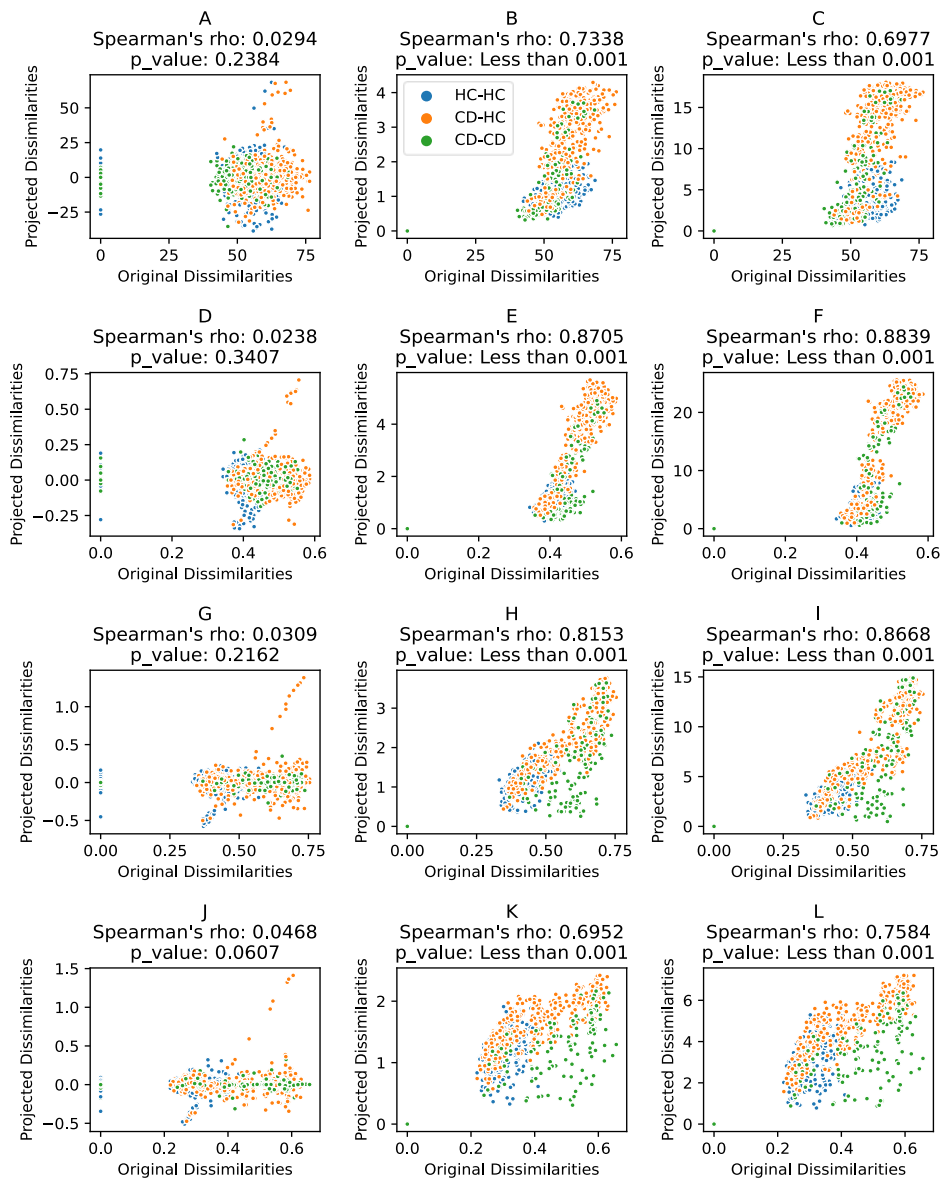

364

365

366

367 *The Choice in Data Transformation Could Impact Generalization Performance*

368           When training using all features, generalization performance in the different subsets of  
369 the healthy gut dataset differed depending on the transformation. When training LANDMark  
370 (Oracle), ET, and RF models on the healthy-gut dataset, a Bayesian analysis showed that the  
371 presence-absence transformation is more likely to yield a model with better generalization  
372 performance in nearly all subsets of the data (Table 2). ET and RF models did perform better  
373 when trained on CLR transformed data in the RS-LS subset. However, this is unlikely to matter  
374 since no model was able to learn a way to classify RS samples from LS samples regardless of  
375 transformation. Since the PA transformed data was more likely to generate better models, we  
376 investigated if there would be any practical difference between models. In the IMID datasets,  
377 generalization performance appeared to depend on both the choice of transformation and  
378 classification model. For example, RF and ET models performed better when trained presence-  
379 absence transformed data in the MS-HC and the performance of these models are likely to be  
380 equivalent in the RA-HC and UC-HC subsets regardless of transformation (Table 2). However,  
381 the performance of LANDMark (Oracle) was best on CLR-transformed data across all subsets.

382

383

384

385

386

387

388 **Table 2: Reporting of results investigating the effect of transformation on generalization**  
 389 **performance.** A Bayesian analysis using Nadeau and Bengio’s corrected t-test was performed  
 390 using each pair of transformations for each classifier. These results were obtained after training  
 391 each model on all ASVs.

| <i>Dataset</i>                               | <i>Subset</i> | <i>Model</i>    | <i>Mean ± Std Dev (PA)</i> | <i>Mean ± Std Dev (CLR)</i> | <i>Probability PA &gt; CLR</i> | <i>Probability PA = CLR</i> | <i>Probability PA &lt; CLR</i> |
|----------------------------------------------|---------------|-----------------|----------------------------|-----------------------------|--------------------------------|-----------------------------|--------------------------------|
| <i>Healthy Gut</i>                           | LS-LB         | <b>LANDMark</b> | <b>0.87 ± 0.05</b>         | <b>0.73 ± 0.08</b>          | <b>1.0</b>                     | <b>0.0</b>                  | <b>0.0</b>                     |
|                                              |               | Extra Trees     | 0.86 ± 0.05                | 0.64 ± 0.13                 | 1.0                            | 0.0                         | 0.0                            |
|                                              |               | Random Forest   | 0.85 ± 0.05                | 0.51 ± 0.04                 | 1.0                            | 0.0                         | 0.0                            |
|                                              | RS-RB         | <b>LANDMark</b> | <b>0.64 ± 0.10</b>         | <b>0.45 ± 0.08</b>          | <b>1.0</b>                     | <b>0.0</b>                  | <b>0.0</b>                     |
|                                              |               | Extra Trees     | 0.66 ± 0.11                | 0.52 ± 0.04                 | 1.0                            | 0.0                         | 0.0                            |
|                                              |               | Random Forest   | 0.65 ± 0.10                | 0.49 ± 0.03                 | 1.0                            | 0.0                         | 0.0                            |
|                                              | RB-LB         | <b>LANDMark</b> | <b>0.75 ± 0.07</b>         | <b>0.72 ± 0.06</b>          | <b>0.58</b>                    | <b>0.42</b>                 | <b>0.002</b>                   |
|                                              |               | Extra Trees     | 0.74 ± 0.08                | 0.54 ± 0.09                 | 1.0                            | 0.0                         | 0.0                            |
|                                              | RS-LS         | Random Forest   | 0.74 ± 0.08                | 0.51 ± 0.03                 | 1.0                            | 0.0                         | 0.0                            |
|                                              |               | <b>LANDMark</b> | <b>0.39 ± 0.09</b>         | <b>0.30 ± 0.08</b>          | <b>0.99</b>                    | <b>0.01</b>                 | <b>0.0</b>                     |
|                                              |               | Extra Trees     | 0.37 ± 0.08                | 0.46 ± 0.07                 | 0.0002                         | 0.02                        | 0.98                           |
|                                              |               |                 | Random Forest              | 0.39 ± 0.09                 | 0.50 ± 0.02                    | 0.0                         | 0.001                          |
| <i>Immune Modulated Inflammatory Disease</i> | CD-HC         | <b>LANDMark</b> | <b>0.83 ± 0.07</b>         | <b>0.88 ± 0.06</b>          | <b>0.0</b>                     | <b>0.08</b>                 | <b>0.92</b>                    |
|                                              |               | Extra Trees     | 0.81 ± 0.08                | 0.82 ± 0.08                 | 0.007                          | 0.80                        | 0.019                          |
|                                              |               | Random Forest   | 0.82 ± 0.08                | 0.81 ± 0.09                 | 0.09                           | 0.90                        | 0.003                          |
|                                              | MS-HC         | <b>LANDMark</b> | <b>0.67 ± 0.08</b>         | <b>0.72 ± 0.09</b>          | <b>0.0003</b>                  | <b>0.07</b>                 | <b>0.93</b>                    |
|                                              |               | Extra Trees     | 0.65 ± 0.09                | 0.60 ± 0.12                 | 0.76                           | 0.23                        | 0.02                           |
|                                              |               | Random Forest   | 0.63 ± 0.07                | 0.57 ± 0.09                 | 0.95                           | 0.05                        | 0.0003                         |
|                                              | RA-HC         | <b>LANDMark</b> | <b>0.72 ± 0.06</b>         | <b>0.81 ± 0.06</b>          | <b>0.0</b>                     | <b>0.0003</b>               | <b>1.0</b>                     |
|                                              |               | Extra Trees     | 0.69 ± 0.07                | 0.69 ± 0.10                 | 0.12                           | 0.62                        | 0.26                           |
|                                              |               | Random Forest   | 0.69 ± 0.07                | 0.68 ± 0.09                 | 0.24                           | 0.65                        | 0.11                           |
|                                              | UC-HC         | <b>LANDMark</b> | <b>0.68 ± 0.08</b>         | <b>0.72 ± 0.07</b>          | <b>0.006</b>                   | <b>0.23</b>                 | <b>0.76</b>                    |
|                                              |               | Extra Trees     | 0.68 ± 0.12                | 0.67 ± 0.10                 | 0.19                           | 0.73                        | 0.08                           |
|                                              |               |                 | Random Forest              | 0.67 ± 0.09                 | 0.65 ± 0.08                    | 0.39                        | 0.57                           |

392

393 *The Supervised LANDMark (Oracle) Classifier Learns Better Decision Rules than the*  
 394 *Random Forest and Extremely Randomized Trees Classifiers*

395 Supervised LANDMark’s ability to split samples into their respective classes using  
 396 multiple features resulted in clearer separations between classes (Figure 6). The decision  
 397 boundaries learned by LANDMark were also less influenced by the peculiarities of the RF or ET  
 398 classifiers. For example, an arcing effect was observed in the PCoA projection of the decision  
 399 space of the RF classifier (Figure 6, Right Panel) while no such pattern could be observed in the  
 400 decision space of the LANDMark classifier (Figure 6, Left Panel). Regardless of which classifier  
 401 was used, the first principal component in each PCoA projection explained a large amount of the  
 402 variance in the decision space. This suggests that each classifier can learn good decision rules

403 which separate different classes of samples (14,37). However, due to the small number of  
 404 samples, the PCoA results for the higher components should be interpreted with some caution.  
 405 Finally, LANDMark (Oracle) models tend to be as good or better than RF or ET models since  
 406 they appear to generalize better (Tables 3 - 5).

407 **Table 3: Results of a Bayesian analysis that investigated the effect of feature selection on**  
 408 **generalization performance.**

| <i>Dataset</i>                               | <i>Subset</i> | <i>Model</i>    | <i>Mean ± Std Dev (Before)</i> | <i>Mean ± Std Dev (After)</i> | <i>Probability Before &gt; After</i> | <i>Probability Before = After</i> | <i>Probability Before &lt; After</i> |
|----------------------------------------------|---------------|-----------------|--------------------------------|-------------------------------|--------------------------------------|-----------------------------------|--------------------------------------|
| <i>Healthy Gut</i>                           | LS-LB         | <b>LANDMark</b> | <b>0.87 ± 0.05</b>             | <b>0.88 ± 0.04</b>            | <b>0.01</b>                          | <b>0.93</b>                       | <b>0.06</b>                          |
|                                              |               | Extra Trees     | 0.86 ± 0.05                    | 0.85 ± 0.06                   | 0.11                                 | 0.87                              | 0.02                                 |
|                                              |               | Random Forest   | 0.85 ± 0.05                    | 0.85 ± 0.05                   | 0.03                                 | 0.97                              | 0.01                                 |
|                                              | RS-RB         | <b>LANDMark</b> | <b>0.64 ± 0.10</b>             | <b>0.64 ± 0.12</b>            | <b>0.11</b>                          | <b>0.80</b>                       | <b>0.08</b>                          |
|                                              |               | Extra Trees     | 0.66 ± 0.11                    | 0.68 ± 0.09                   | 0.01                                 | 0.65                              | 0.34                                 |
|                                              |               | Random Forest   | 0.65 ± 0.10                    | 0.68 ± 0.10                   | 0.01                                 | 0.34                              | 0.65                                 |
|                                              | RB-LB         | <b>LANDMark</b> | <b>0.75 ± 0.07</b>             | <b>0.74 ± 0.09</b>            | <b>0.25</b>                          | <b>0.73</b>                       | <b>0.02</b>                          |
|                                              |               | Extra Trees     | 0.74 ± 0.08                    | 0.74 ± 0.08                   | 0.06                                 | 0.92                              | 0.02                                 |
|                                              |               | Random Forest   | 0.74 ± 0.08                    | 0.72 ± 0.08                   | 0.38                                 | 0.59                              | 0.03                                 |
| <i>Immune Modulated Inflammatory Disease</i> | CD-HC         | <b>LANDMark</b> | <b>0.88 ± 0.06</b>             | <b>0.86 ± 0.06</b>            | <b>0.29</b>                          | <b>0.71</b>                       | <b>0.0</b>                           |
|                                              |               | Extra Trees     | 0.82 ± 0.08                    | 0.85 ± 0.07                   | 0.0                                  | 0.45                              | 0.55                                 |
|                                              |               | Random Forest   | 0.81 ± 0.09                    | 0.83 ± 0.09                   | 0.003                                | 0.59                              | 0.40                                 |
|                                              | MS-HC         | <b>LANDMark</b> | <b>0.72 ± 0.09</b>             | <b>0.72 ± 0.10</b>            | <b>0.14</b>                          | <b>0.79</b>                       | <b>0.07</b>                          |
|                                              |               | Extra Trees     | 0.60 ± 0.12                    | 0.63 ± 0.11                   | 0.01                                 | 0.44                              | 0.55                                 |
|                                              |               | Random Forest   | 0.57 ± 0.09                    | 0.61 ± 0.11                   | 0.0                                  | 0.18                              | 0.82                                 |
|                                              | RA-HC         | <b>LANDMark</b> | <b>0.81 ± 0.06</b>             | <b>0.80 ± 0.08</b>            | <b>0.17</b>                          | <b>0.78</b>                       | <b>0.05</b>                          |
|                                              |               | Extra Trees     | 0.69 ± 0.10                    | 0.75 ± 0.08                   | 0.0                                  | 0.11                              | 0.89                                 |
|                                              |               | Random Forest   | 0.68 ± 0.09                    | 0.75 ± 0.08                   | 0.0                                  | 0.05                              | 0.95                                 |
|                                              | UC-HC         | <b>LANDMark</b> | <b>0.72 ± 0.07</b>             | <b>0.73 ± 0.07</b>            | <b>0.04</b>                          | <b>0.72</b>                       | <b>0.24</b>                          |
|                                              |               | Extra Trees     | 0.67 ± 0.10                    | 0.69 ± 0.10                   | 0.0                                  | 0.52                              | 0.48                                 |
|                                              |               | Random Forest   | 0.65 ± 0.08                    | 0.68 ± 0.08                   | 0.0                                  | 0.68                              | 0.62                                 |

409

410

411

412

413

414

415

416 **Table 4: Results of a Bayesian analysis comparing the generalization performance of**  
 417 **different models before feature selection.** These results were obtained using the best-  
 418 performing transformation.

| <i>Dataset</i>                                                     | <i>Subset</i> | <i>Model A</i> | <i>Model B</i> | <i>Probability<br/>Model A &gt;<br/>Model B</i> | <i>Probability<br/>Model A =<br/>Model B</i> | <i>Probability<br/>Model A &lt;<br/>Model B</i> |
|--------------------------------------------------------------------|---------------|----------------|----------------|-------------------------------------------------|----------------------------------------------|-------------------------------------------------|
| <i>Healthy Gut<br/>(Presence –<br/>Absence)</i>                    | LS-LB         | LANDMark       | Extra Trees    | 0.17                                            | 0.83                                         | 0.0003                                          |
|                                                                    |               | LANDMark       | Random Forest  | 0.31                                            | 0.68                                         | 0.0                                             |
|                                                                    | RS-RB         | Extra Trees    | Random Forest  | 0.03                                            | 0.96                                         | 0.004                                           |
|                                                                    |               | LANDMark       | Extra Trees    | 0.01                                            | 0.60                                         | 0.39                                            |
|                                                                    |               | LANDMark       | Random Forest  | 0.09                                            | 0.63                                         | 0.28                                            |
|                                                                    |               | Extra Trees    | Random Forest  | 0.15                                            | 0.84                                         | 0.01                                            |
|                                                                    | RB-LB         | LANDMark       | Extra Trees    | 0.18                                            | 0.80                                         | 0.02                                            |
|                                                                    |               | LANDMark       | Random Forest  | 0.27                                            | 0.71                                         | 0.02                                            |
|                                                                    |               | Extra Trees    | Random Forest  | 0.13                                            | 0.80                                         | 0.07                                            |
| <i>Immune<br/>Modulated<br/>Inflammatory<br/>Disease<br/>(CLR)</i> | CD-HC         | LANDMark       | Extra Trees    | 0.93                                            | 0.07                                         | 0.0004                                          |
|                                                                    |               | LANDMark       | Random Forest  | 0.96                                            | 0.04                                         | 0.0003                                          |
|                                                                    |               | Extra Trees    | Random Forest  | 0.10                                            | 0.90                                         | 0.0001                                          |
|                                                                    | MS-HC         | LANDMark       | Extra Trees    | 0.99                                            | 0.007                                        | 0.0002                                          |
|                                                                    |               | LANDMark       | Random Forest  | 1.00                                            | 0.0                                          | 0.0                                             |
|                                                                    |               | Extra Trees    | Random Forest  | 0.63                                            | 0.36                                         | 0.008                                           |
|                                                                    | RA-HC         | LANDMark       | Extra Trees    | 1.00                                            | 0.002                                        | 0.0                                             |
|                                                                    |               | LANDMark       | Random Forest  | 1.00                                            | 0.0004                                       | 0.0                                             |
|                                                                    |               | Extra Trees    | Random Forest  | 0.18                                            | 0.79                                         | 0.03                                            |
|                                                                    | UC-HC         | LANDMark       | Extra Trees    | 0.78                                            | 0.20                                         | 0.02                                            |
|                                                                    |               | LANDMark       | Random Forest  | 0.97                                            | 0.03                                         | 0.0004                                          |
|                                                                    |               | Extra Trees    | Random Forest  | 0.46                                            | 0.53                                         | 0.006                                           |

419

420 **Table 5: Results of a Bayesian analysis comparing the generalization performance of**  
 421 **different models after feature selection.** These results were obtained using the best-performing  
 422 transformation.

| <i>Dataset</i>                                                     | <i>Subset</i> | <i>Model A</i> | <i>Model B</i> | <i>Probability<br/>Model A &gt;<br/>Model B</i> | <i>Probability<br/>Model A =<br/>Model B</i> | <i>Probability<br/>Model A &lt;<br/>Model B</i> |
|--------------------------------------------------------------------|---------------|----------------|----------------|-------------------------------------------------|----------------------------------------------|-------------------------------------------------|
| <i>Healthy Gut<br/>(Presence –<br/>Absence)</i>                    | LS-LB         | LANDMark       | Extra Trees    | 0.58                                            | 0.42                                         | 0.002                                           |
|                                                                    |               | LANDMark       | Random Forest  | 0.68                                            | 0.32                                         | 0.0                                             |
|                                                                    | RS-RB         | Extra Trees    | Random Forest  | 0.07                                            | 0.89                                         | 0.04                                            |
|                                                                    |               | LANDMark       | Extra Trees    | 0.01                                            | 0.28                                         | 0.71                                            |
|                                                                    |               | LANDMark       | Random Forest  | 0.0008                                          | 0.16                                         | 0.84                                            |
|                                                                    |               | Extra Trees    | Random Forest  | 0.07                                            | 0.77                                         | 0.16                                            |
|                                                                    | RB-LB         | LANDMark       | Extra Trees    | 0.09                                            | 0.81                                         | 0.09                                            |
|                                                                    |               | LANDMark       | Random Forest  | 0.36                                            | 0.63                                         | 0.01                                            |
|                                                                    |               | Extra Trees    | Random Forest  | 0.37                                            | 0.62                                         | 0.02                                            |
| <i>Immune<br/>Modulated<br/>Inflammatory<br/>Disease<br/>(CLR)</i> | CD-HC         | LANDMark       | Extra Trees    | 0.26                                            | 0.72                                         | 0.02                                            |
|                                                                    |               | LANDMark       | Random Forest  | 0.59                                            | 0.40                                         | 0.01                                            |
|                                                                    |               | Extra Trees    | Random Forest  | 0.30                                            | 0.70                                         | 0.0                                             |
|                                                                    | MS-HC         | LANDMark       | Extra Trees    | 0.97                                            | 0.03                                         | 0.0                                             |
|                                                                    |               | LANDMark       | Random Forest  | 0.99                                            | 0.01                                         | 0.0                                             |
|                                                                    |               | Extra Trees    | Random Forest  | 0.40                                            | 0.58                                         | 0.04                                            |
|                                                                    | RA-HC         | LANDMark       | Extra Trees    | 0.86                                            | 0.14                                         | 0.0                                             |
|                                                                    |               | LANDMark       | Random Forest  | 0.87                                            | 0.13                                         | 0.0                                             |
|                                                                    |               | Extra Trees    | Random Forest  | 0.16                                            | 0.75                                         | 0.09                                            |
|                                                                    | UC-HC         | LANDMark       | Extra Trees    | 0.68                                            | 0.30                                         | 0.03                                            |
|                                                                    |               | LANDMark       | Random Forest  | 0.87                                            | 0.12                                         | 0.003                                           |
|                                                                    |               | Extra Trees    | Random Forest  | 0.35                                            | 0.63                                         | 0.01                                            |

423

424 **Figure 6: Principal Coordinate Analysis projections of test data can be used to assess model**  
425 **fit.** Proximity matrices extracted from supervised LANDMark (Oracle) (Left) and Random  
426 Forest (Right) models trained on centered-log ratio transformed counts from the Crohn's Disease  
427 subset of the Immune-Mediated Inflammatory Disease dataset were projected into two  
428 dimensions using PCoA. Higher explained variation along the first principal component reflects  
429 the ability of each model to learn a simple set of decision rules. Healthy controls are colored  
430 orange while samples from patients suffering from Crohn's Disease are colored blue. Coloring of  
431 points serves as a visual aid and it does not affect the result.

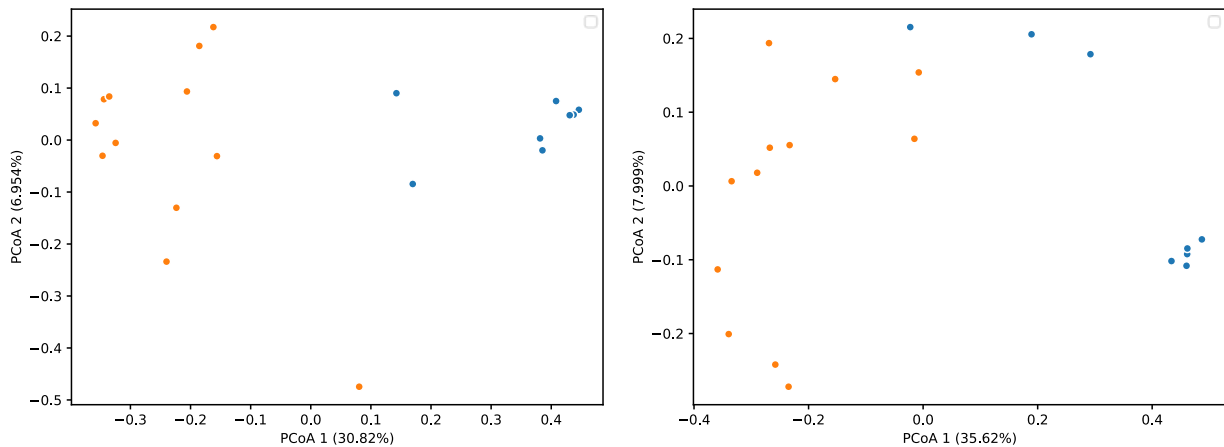

432  
433

434 ***ASVs Predicted to Have a High Impact on Model Performance is Consistent with Previously***  
435 ***Reported Results***

436 The ASVs identified using LANDMark (Oracle) and RFE in the LB-LS subset of the  
437 healthy gut dataset are generally consistent with what was reported by Flynn et al. (19). We  
438 confirmed that *Turicibacter spp.*, *Peptoniphilus spp.*, and *Fingoldia spp.* play a role in  
439 differentiating these two sites (19) (Suppl Figures 1 and 2). However, the results suggest that the  
440 individual impact that these ASVs have on classification is somewhat muted. Also, the  
441 differences in overall importance may be due to the experimental design since we built our  
442 models using 50% of the dataset. The ASV which had the strongest influence on generalization  
443 performance in test samples, ASV 317, belonged to *Schaalia spp.* and was not originally  
444 identified as important. Interestingly, ASV 576 (assigned to *Anaeromassilibacillus spp.*) was  
445 only present in one test sample but its absence strongly shifted the predictions of the model



446 towards both types of samples, suggesting a possible interaction between one or more ASVs.  
447 Currently, it is difficult to determine interactions between ASVs using LANDMark. To  
448 investigate potential interactions involving ASV 576, an Extremely Randomized Trees model  
449 with 2048 trees was trained. This approach was chosen since it has been shown to approximate a  
450 non-linear function as the number of trees increases (33,34). While classification was not perfect  
451 (balanced accuracy score of 0.9) this follow-up analysis did confirm that ASVs 317 (*Schaalia*),  
452 457 (*Enterocloster*), 429 (*Faecalicatena*), 120 (*Veillonella*), 610 (*Eisenbergiella*), and 249  
453 (*Lawsonibacter*) primarily impact classification and that the effect of ASV 576 is likely an  
454 artifact (Suppl Figure 3).

455 We identified a group of ASVs which are important for distinguishing between CD and  
456 HC samples. ASVs belonging to *Gemmiger*, *Coprococcus*, and *Lachnospiraceae incertae sedis*  
457 were included in this group. Furthermore, the genera identified by our model are consistent with  
458 those reported in the original work (3). Lower abundance in ASVs 18, 64, 36, 95, 187, and 92 -  
459 shift model predictions away from HCs. These ASVs were assigned to the genera *Gemmiger*,  
460 *Coprococcus*, and *Blautia* (for the remainder) respectively. Interestingly, a higher abundance of  
461 these ASVs did not result in a strong shift towards the prediction of a HC. An increase in the  
462 abundance of ASV 39 (*Lachnospiraceae incertae sedis*) shifts predictions towards CD. A sixth  
463 ASV which was assigned to the genus *Monoglobus*, a taxon that was not previously identified as  
464 important, was identified in our analysis (Figure 7). While a detailed discussion of *Monoglobus*  
465 is outside the scope of this work, this species has been shown to be involved in pectin  
466 degradation and the metabolites produced from these pathways are important mediators of the  
467 inflammatory response (38,39). Within test samples from the first time point higher abundance  
468 of this ASV tended to shift some predictions towards healthy controls while a lower abundance

469 of this ASV tends to shift predictions away from healthy controls. In a follow-up analysis using  
470 the second time point, however, the impact this ASV had on model predictions was considerably  
471 more muted (Suppl Figure 4). Finally, our analysis identified a group of additional ASVs (which  
472 included taxa such as *Terrisporobacter*, *Neglecta*, *Roseburia*) where a decrease in abundance  
473 tends to shift predictions towards CD. The overall influence that these ASVs exert on prediction  
474 is smaller, however.

475

476

477

478

479

480

481

482

483

484

485

486

487

488 **Figure 7: Analysis of LANDMark (Oracle) models using model agnostic approaches can**  
489 **identify sets of predictive ASVs.** These ASVs were identified using recursive feature  
490 elimination. Changes in the abundance (bottom, with pink indicating higher abundance) of  
491 specific ASVs appears to be related to how strongly (top) ASVs shift model predictions towards  
492 CD or a healthy control (HC). In the top graph, positive values (pink) indicate model predictions  
493 are shifted towards CD while negative values (blue) indicate shifts towards HCs. An asterisk  
494 denotes a sample that was not correctly predicted.

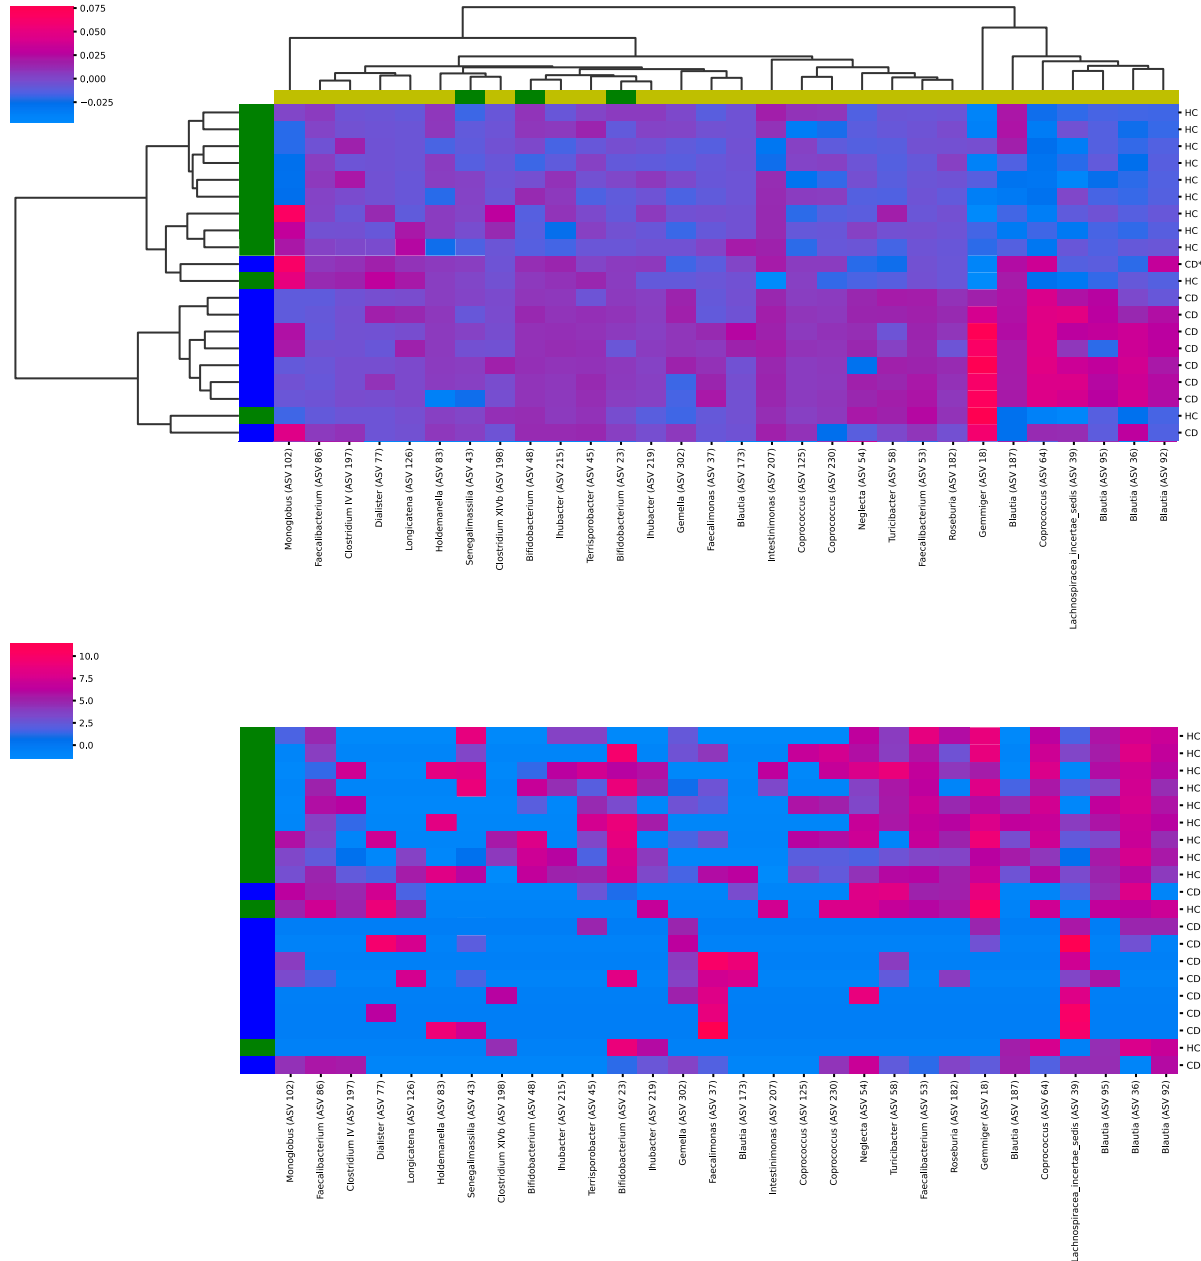

495  
496

497

## 498 **Discussion**

499           The datasets investigated here were chosen since the human gut microbiome is an  
500 important area of medical research and is becoming increasingly linked to important disease  
501 phenotypes. Since machine learning models are becoming increasingly used to identify  
502 predictive features, it is important to understand how the quality and interpretation of results  
503 change depending on the machine learning model. This will hopefully allow greater insights into  
504 the composition and function of the human microbiome. The choice of transformation and  
505 dissimilarity measure is an important consideration when investigating microbiome data. It has  
506 long been known that the choice of dissimilarity measure can influence our measurement and  
507 interpretation of the main gradients influencing the structure of communities and taxonomic  
508 similarity between pairs of samples (40,41). For example, recent investigations have  
509 demonstrated that this choice can result in misleading results due to the sparsity inherent to the  
510 data, and differences in library size and sampling (24,27,42). To combat these problems a  
511 multitude of dissimilarity measures and ordination approaches have been developed to  
512 summarize and visualize ASV differences between sites (41). However, it remains incomplete  
513 since distance metrics and other commonly used dissimilarity measures have difficulty capturing  
514 potential interactions between ASVs. For example, the Jaccard distance simply calculates the  
515 number of shared ASVs over the total number of unique ASVs between two communities and it  
516 fails to consider how dependencies between ASVs influence the structure of a community. An  
517 example of such a dependency occurs when the presence of one ASV depends on the exclusion  
518 of another (43). Furthermore, when using measures that use abundance information, it is simple  
519 to show how differences in abundances can result in situations where the sites that share the  
520 same species are more dissimilar than sites that have no species in common. While applying

521 transformations, such as CLR or converting to presence-absence, can help in these situations, a  
522 review of the literature suggests that there is yet to be a consensus on which approach is best  
523 (24,41,44,45). Our results are also unclear in this matter and suggest that the best choice in  
524 transformation will depend on both the dataset and model being used. For example, our results  
525 suggest that the presence-absence transformation may be better suited when samples come from  
526 (or are suspected to come from) two or more distinct ecological niches, such as the lumen and  
527 mucosa of the colon (46). This likely occurs since differences between these communities are  
528 dominated by changes in the presence and absence of specific organisms rather than abundance.  
529 However, when analyzing changes occurring within similar niches, such as those derived from  
530 stool, the CLR transformation may be more useful since it is sensitive to changes within  
531 compositions (28,47).

532       Alternative approaches to measuring pairwise dissimilarity, such as learning a dissimilarity  
533 measure, have also been developed and applied to the analysis of genomic and transcriptomic  
534 datasets (13,16,17,29). Unfortunately, while the properties of various dissimilarity measures  
535 have been extensively investigated, comparatively little work has been done exploring how  
536 learned dissimilarity measures can be used to investigate the same data. They are particularly  
537 interesting since they can learn a representation of the underlying manifold upon which the input  
538 samples are embedded (29,48). Given that amplicon sequencing datasets tend to lie on such  
539 manifolds, using learned dissimilarities could represent a potentially powerful way to analyze  
540 these datasets. Furthermore, since these dissimilarity matrices are derived from decision tree  
541 ensembles, interactions between ASVs are potentially accounted for, thereby overcoming one of  
542 the weaknesses of distance metrics (7,43,48). Therefore, using learned dissimilarities could result  
543 in the construction of more informative ordinations.

544 Our experiments show that a PCoA, on its own, is not able to adequately project samples into  
545 an appropriate embedding. This occurs since PCoA is a type of matrix factorization algorithm  
546 and it is difficult to construct linear representation in cases where the input manifold is non-  
547 linear. In these cases, PCoA cannot adequately preserve relationships between samples and the  
548 resulting projection would not effectively capture important aspects of the data. This is evident in  
549 Figures 2 and 3, which demonstrate that the first two principal axes of each PCoA projection of  
550 the original dissimilarities explain only a small fraction of the variation in each dataset. This is  
551 further underscored by the data presented in panels A, D, G and J of Figures 4 and 5 panels.  
552 These experiments clearly show that PCoA only rotates the input space and does not preserve the  
553 pairwise dissimilarities between samples in the resulting projection. Graph algorithms, such as  
554 UMAP, are an attractive alternative since these approaches are designed to learn an appropriate  
555 representation of the input manifold. Our experiments, evidenced in Figures 4 and 5, show that  
556 UMAP (and UMAP followed by PCoA) preserves the relationships between samples in the  
557 projected space since the pairwise dissimilarities in the original and projected space are  
558 correlated (31,49). Simply put, if the distance or dissimilarity between a pair of samples is large  
559 in the original space it tends to be large in the projected space. Applying these algorithms to our  
560 datasets allowed us to effectively visualize the relationships between samples, specifically  
561 differences in sampling location, with minimal distortion. Our results also support the growing  
562 body of work that shows that UMAP preserves the overall structure of HTS datasets and that it is  
563 more capable of representing sources of biological variation than PCoA (32). Finally, since the  
564 number of components used to construct the UMAP projection is arbitrary, we strongly suggest  
565 that a grid search over two UMAP parameters, the number of components and neighbors, is run

566 so that a projection that best preserves the pairwise dissimilarity between samples can be  
567 constructed.

568 The dissimilarity matrices learned by unsupervised LANDMark (Oracle) resulted in  
569 projections that more clearly distinguished between the known main effects (sampling location  
570 and disease phenotype) (Table 1). Also, as the number of features used for splitting in  
571 LANDMark (Oracle) increased, the explanatory power of the main effects grew. This result  
572 demonstrates that distance metrics, such as the Jaccard or Aitchison metrics, might not capture  
573 the important differences between samples as readily as learned dissimilarities. One possible  
574 explanation for this result could be due to the inclusion of an increasing number of irrelevant  
575 dimensions as the dimensionality of the dataset increases (50,51). In amplicon sequencing  
576 datasets, irrelevant dimensions likely occur due to the inclusion of uninformative ASVs,  
577 potentially informative but highly variable ASVs, splitting a single genome, and missing data  
578 (24,27,52,53). Learned dissimilarity measures, such as those explored here, may be capable of  
579 identifying and reducing the impact uninformative ASVs exert when measuring dissimilarity.  
580 For example, in a RF classifier only ASVs which result in the best split are chosen at each node  
581 (13). Therefore, the impact of uninformative ASVs tends to be minimized since they are not  
582 selected as often. LANDMark (Oracle) extends this idea by identifying which linear or non-  
583 linear model is best at discriminating between classes using a randomly selected coalition of  
584 ASVs (37).

585 We show that using oblique decision tree ensemble classifiers, such as LANDMark (Oracle),  
586 can result in a highly predictive model. In this work, we show that a LANDMark (Oracle)  
587 classifier was likely to be at least as good as the ET or RF classifiers. Furthermore, when  
588 compared to RF and ET classifiers, we demonstrate that using feature selection is less likely to

589 impact the generalization performance of a LANDMark (Oracle) classifier (Table 3). This result  
590 is important since it suggests that LANDMark (Oracle) is more robust to noise, especially when  
591 trained on CLR-transformed data. Furthermore, it is important to consider the shape of the  
592 decision boundaries learned by these classifiers. Both the RF and ET classifiers will produce a  
593 blocky boundary since each is only capable of learning axis-aligned splitting rules, although the  
594 boundary learned by ET tends to be smoother due to the random selection of cut-points (14,34).  
595 Smoother boundaries are preferred since they are likely to be a more faithful approximation of  
596 the rules which generate the data being studied (14,54). While the performance of all three  
597 models was similar in some instances, issues in the decision boundaries in these instances were  
598 noted. Specifically, we observed structures in the higher components of a PCoA using proximity  
599 matrices derived from supervised RF and ET models. In contrast, these structures did not exist in  
600 LANDMark (Oracle) models, implying the learning of a smoother boundary. This is consistent  
601 with other work involving this class of classifiers (14,37).

602 The generalization performance of our models tended to differ from that reported in the  
603 original work (3,19). We believe that these differences arose from differences in methodology,  
604 the use of ASVs, our choice of transformation, and our use of split-half cross-validation. Since  
605 we chose to analyze ASVs instead of OTUs, the dimensionality of our dataset substantially  
606 increased. For example, in the original IMID study the authors used 383 OTUs while our study  
607 found 702 ASVs (3). While using ASVs can provide a richer amount of information,  
608 generalization performance may degrade if ASVs artificially split bacterial genomes into  
609 different clusters (52). This occurs since the signal from one unique strain will now be spread  
610 over multiple ASVs. While this can lead to lower classification performance, this choice is  
611 justifiable since the results of our analysis are reproducible and these ASVs we identified as



612 important can be used to generate new hypotheses for future experiments (55). The number of  
613 trees used to train our models and how generalization performance was calculated were also  
614 different. The original IMID work used 500 trees and calculated generalization performance  
615 using the out-of-bag error while the work by Flynn et al. (2018) used non-rarefied data as input  
616 and measured generalization performance using AUC scores (3,19). In contrast, we used 128  
617 trees and split our data into training and testing sets using repeated split-half cross-validation.  
618 Previous work has demonstrated that after 128 trees the performance of a RF tends to plateau  
619 (30,37). Some additional testing using the various subsets of the IMID dataset demonstrated that  
620 adding additional trees to our analysis is unlikely to result in substantially better performance  
621 (Suppl Table 1). Finally, and likely the most significant contributor to differences in  
622 generalization performance, is our choice to use repeated split-half cross-validation. This  
623 approach is expected to result in decreased generalization performance since fewer samples are  
624 used for training. However, the advantage of this approach is that the overlap between training  
625 datasets is minimized (56). This reduces the dependence between different estimates of  
626 generalization performance thereby improving the ability to detect a true difference between the  
627 generalization performance of two classifiers (56). An additional advantage of using split-half  
628 cross-validation is that we can use more testing samples to calculate feature importance scores.

629 The ASVs identified as important by LANDMark (Oracle) are consistent with those  
630 identified in the original studies. This not only confirms the viability of LANDMark (Oracle) in  
631 this area of research, but it also strengthens the original work as their findings were replicated  
632 using a very different approach. Our work also demonstrates that classifiers such as LANDMark  
633 can not only validate the results of the original studies, but they can also add additional insights.  
634 For example, in the LS-LB investigation LANDMark (Oracle) identified *Schaalia spp.* as an

635 important marker capable of distinguishing between the proximal lumen and mucosa of the  
636 colon. Finally, while detecting single ASV biomarkers is important, we should always be  
637 cognizant of the fact that these organisms interact with each other and the host. Therefore, when  
638 building and analyzing predictive models it is important to use approaches that can explore,  
639 quantify, and validate these interactions. In addition to detecting strongly predictive ASVs, our  
640 approach was also capable of detecting ASVs which have a more subtle effect on predicting CD  
641 and HC patients and whether samples originated in the distal or the proximal colon.

642       When looking at the ASVs identified by each model, both the RF and ET identified fewer  
643 ASVs than LANDMark (Oracle). The larger number of ASVs identified by LANDMark (Oracle)  
644 is likely due to differences in the way in which nodes are constructed. In RF and ET classifiers,  
645 only single features are used to construct each node (13,34). Therefore, only a very small fraction  
646 of features (at most  $n-1$ , where  $n$  is the number of samples) will be used to construct each tree. In  
647 practice, however, it is more likely that fewer features will be used if particularly good splits are  
648 found. It is also possible that features are reused at deeper nodes within each tree. This form of  
649 tree construction has also been shown to have a strong regularizing effect, which could limit the  
650 amount of available information upon which decisions are made (57). While it is likely that a  
651 regularization effect similar to that observed in RF and ET occurs in LANDMark, the strength of  
652 this effect may be more muted because LANDMark considers more features at each node (37).  
653 This allows a richer amount of information to be used to construct each tree but comes at the cost  
654 of including features that may have a limited impact on classification. For this reason, we believe  
655 it is particularly important to pair LANDMark models with model agnostic introspection  
656 algorithms, such as Permutation Explainer, which are capable of quantifying feature importance  
657 and interactions between features (58). It is also important to note that genome splitting could

658 also contribute to this effect (52). For example, multiple ASVs assigned to *Peptoniphilus* in the  
659 LS-LB data and *Blautia* and *Coprococcus* in the CD-HC data. Therefore, additional work is  
660 needed to determine the extent of this issue in 16S datasets. Work is also needed to determine  
661 how best to handle this problem.

## 662 **Conclusions and Future Work**

663 Our work has shown that unsupervised LANDMark (Oracle) models can learn effective  
664 dissimilarity matrices. When paired with modern dimensionality reduction approaches, such as  
665 UMAP, the global structure of the original dissimilarity matrix is preserved. UMAP  
666 representations can then be combined with existing matrix factorization approaches to create  
667 informative ordinations. However, this comes at a cost of clarity since it is difficult to determine  
668 how variance along each axis is related to the presence/absence or abundance of each ASV.  
669 Therefore, it is important to conduct work investigating approaches capable of identifying which  
670 ASVs impact the location of samples in the transformed space. Finally, we show that  
671 LANDMark (Oracle) can learn highly predictive models after feature selection. Importantly, the  
672 ASVs identified by feature selection is consistent with contemporary work. Due to the way  
673 LANDMark constructs each tree, further investigations into the integration of feature selection  
674 and a statistical analysis of the resulting feature impact scores are necessary. This could  
675 potentially identify a small subset of highly predictive ASVs and this analysis would sidestep the  
676 need to use generalized linear models since the degree of confidence in the impact that each ASV  
677 has on classification is evaluated rather than differences in abundance/presence.

## 678 **Declarations**

679 *Ethics approval and consent to participate*

680 Not Applicable

681 ***Consent for publication***

682 Not Applicable

683 ***Availability of data and materials***

684 Authors can confirm that all relevant data are included in the article and/or its supplementary  
685 information files.

686 ***Competing interests***

687 The authors declare that they have no competing interests.

688 ***Funding***

689 JR is supported by funds from the Food from Thought project as part of Canada First Research  
690 Excellence Fund. MH received funding from the Government of Canada through Genome  
691 Canada and Ontario Genomics. BG is supported by a Natural Sciences and Engineering Research  
692 Council of Canada (NSERC) grant (RGPIN-2020-05733).

693 ***Authors' contributions***

694 JR and MH conceived the project. JR analyzed/interpreted the results. JR wrote the draft. JR,  
695 MH, BG, and SK read, discussed, and contributed to the draft. MH provided computational  
696 resources. All authors have read and approved the final manuscript.

697 ***Acknowledgements***

698 We would like to thank Dr. Katie McGee and Dr. Terri M. Porter for their thoughtful discussions  
699 during the development of LANDMark.

700

## 701 **References**

- 702 1. Strimbu K, Tavel JA. What are biomarkers? *Curr Opin HIV AIDS*. 2010 Nov;5(6):463–6.
- 703 2. Zhang Z, Liu Z-P. Robust biomarker discovery for hepatocellular carcinoma from high-throughput  
704 data by multiple feature selection methods. *BMC Med Genomics*. 2021 Aug 25;14(Suppl 1):112–  
705 112.
- 706 3. Forbes JD, Chen C-Y, Knox NC, Marrie R-A, El-Gabalawy H, de Kievit T, et al. A comparative study of  
707 the gut microbiota in immune-mediated inflammatory diseases-does a common dysbiosis exist?  
708 *Microbiome*. 2018 Dec 13;6(1):221–221.
- 709 4. DiCarlo GE, Mabry SJ, Cao X, McMillan C, Woynaroski TG, Harrison FE, et al. Autism-Associated  
710 Variant in the SLC6A3 Gene Alters the Oral Microbiome and Metabolism in a Murine Model. *Front*  
711 *Psychiatry*. 2021 Apr 15;12:655451–655451.
- 712 5. Paulson JN, Stine OC, Bravo HC, M P. Robust methods for differential abundance analysis in marker  
713 gene surveys. *Nature Methods*. 2013;10(12):1200–2.
- 714 6. Love MI, Huber W, Anders S. Moderated estimation of fold change and dispersion for RNA-seq  
715 data with DESeq2. *Genome Biology*. 2014 Dec 5;15(12):550.
- 716 7. Cutler RD, Edwards TC, Beard KH, Cutler A, Hess KT, Gibson J, et al. Random Forests for  
717 Classification in Ecology. *Ecology*. 2007;88(11):2783–92.
- 718 8. Ryo M, Rillig MC. Statistically reinforced machine learning for nonlinear patterns and variable  
719 interactions. *Ecosphere*. 2017;8(11):01976.
- 720 9. Lundberg SM, Erion G, Chen H, DeGrave A, Prutkin JM, Nair B, et al. From local explanations to  
721 global understanding with explainable AI for trees. *Nat Mach Intell*. 2020;2(1):56–67.
- 722 10. Wang J, Chai J, Sun L, Zhao J, Chang C. The sputum microbiome associated with different sub-types  
723 of AECOPD in a Chinese cohort. *BMC Infectious Diseases*. 2020 Aug 18;20(1):610.
- 724 11. Aryal S, Alimadadi A, Manandhar I, Joe B, Cheng X. Machine Learning Strategy for Gut Microbiome-  
725 Based Diagnostic Screening of Cardiovascular Disease. *Hypertension*. 2020;76(5):1555–62.
- 726 12. Kubinski R, Djamen-Kepaou J-Y, Zhanabaev T, Hernandez-Garcia A, Bauer S, Hildebrand F, et al.  
727 Benchmark of data processing methods and machine learning models for gut microbiome-based  
728 diagnosis of inflammatory bowel disease. *bioRxiv [Internet]*. 2021; Available from:  
729 <https://www.biorxiv.org/content/early/2021/05/04/2021.05.03.442488>
- 730 13. Breiman L. Random Forests. *Machine Learning*. 2001;45(1):5–32.

- 731 14. Menze BH, M K, Splitthoff DN, K K, Hamprecht FA. On oblique random forests. In: Gunopulos D,  
732 Hofmann T, Malerba D, Vazirgiannis M, editors. Machine Learning and Knowledge Discovery in  
733 Databases. 2011. p. 453–69.
- 734 15. Ehsani R, Drabløs F. Robust Distance Measures for kNN Classification of Cancer Data. *Cancer*  
735 *Inform.* 2020 Oct 13;19:1176935120965542.
- 736 16. Pouyan MB, Kostka D. Random forest based similarity learning for single cell RNA sequencing data.  
737 *Bioinformatics.* 2018 Jul 1;34(13):i79–88.
- 738 17. Alhusain L, Hafez AM. Cluster ensemble based on Random Forests for genetic data. *BioData*  
739 *Mining.* 2017 Dec 15;10(1):37.
- 740 18. Chen X, Ishwaran H. Random forests for genomic data analysis. *Genomics.* 2012 Jun 1;99(6):323–9.
- 741 19. Flynn K, Ruffin MT IV, Turgeon K, Schloss PD. Spatial Variation of the Native Colon Microbiota in  
742 Healthy Adults. *Cancer Prevention Research.* 2018;11(7):393–402.
- 743 20. Porter TM, Hajibabaei M. METAWORKS: A flexible, scalable bioinformatic pipeline for multi-marker  
744 biodiversity assessments. *bioRxiv.* 2020;
- 745 21. Rognes T, Flouri T, Nichols B, Quince C, Mahe F. VSEARCH: a versatile open source tool for  
746 metagenomics. *PeerJ.* 2016;4:2584.
- 747 22. Wang Q, Garrity GM, Tiedje JM, Cole JR. Naive Bayesian classifier for rapid assignment of rRNA  
748 sequences into the new bacterial taxonomy. *Applied and Environmental Microbiology.* 2007  
749 Aug;73(16):5261–7.
- 750 23. Claesson MJ, O’Sullivan O, Wang Q, Nikkilä J, Marchesi JR, Smidt H, et al. Comparative Analysis of  
751 Pyrosequencing and a Phylogenetic Microarray for Exploring Microbial Community Structures in  
752 the Human Distal Intestine. *PLOS ONE.* 2009 Aug;4(8):1–15.
- 753 24. Gloor GB, Macklaim JM, Pawlovsky-Glahn V, Egozcue JJ. Microbiome Datasets Are Compositional:  
754 And This Is Not Optional. *Front Microbiol.* 2017;8:2224.
- 755 25. Ranasinghe JA, Stein ED, Miller PE, Weisberg SB. Performance of two Southern California benthic  
756 community indices using species abundance and presence-only data: relevance to DNA barcoding.  
757 *PLoS One.* 2012;7(8):40875.
- 758 26. Wallen ZD. Comparison study of differential abundance testing methods using two large Parkinson  
759 disease gut microbiome datasets derived from 16S amplicon sequencing. *BMC Bioinformatics.*  
760 2021 May 25;22(1):265.
- 761 27. Hugerth LW, Andersson AF. Analysing Microbial Community Composition through Amplicon  
762 Sequencing: From Sampling to Hypothesis Testing. *Frontiers in Microbiology.* 2017;8:1561.
- 763 28. Martino C, Morton JT, Marotz CA, Thompson LR, Tripathi A, Knight R, et al. A Novel Sparse  
764 Compositional Technique Reveals Microbial Perturbations. *mSystems.* 2019 Feb;4(1).

- 765 29. Xiong C, Johnson D, Xu R, Corso JJ. Random Forests for Metric Learning with Implicit Pairwise  
766 Position Dependence. In: Proceedings of the 18th ACM SIGKDD International Conference on  
767 Knowledge Discovery and Data Mining [Internet]. New York, NY, USA: Association for Computing  
768 Machinery; 2012. p. 958–66. (KDD '12). Available from: <https://doi.org/10.1145/2339530.2339680>
- 769 30. Oshiro TM, Perez PS, Baranauskas JA. How Many Trees in a Random Forest? In: Perner P, editor.  
770 Machine Learning and Data Mining in Pattern Recognition. Berlin, Heidelberg: Springer Berlin  
771 Heidelberg; 2012. p. 154–68.
- 772 31. McInnes L, Healy J, Melville J. UMAP: Uniform Manifold Approximation and Projection for  
773 Dimension Reduction. *Journal of Open Source Software*. 2020;3(29):861.
- 774 32. Armstrong G, Martino C, Rahman G, Gonzalez A, Vázquez-Baeza Y, Mishne G, et al. Uniform  
775 Manifold Approximation and Projection (UMAP) Reveals Composite Patterns and Resolves  
776 Visualization Artifacts in Microbiome Data. *mSystems*. 0(0):e00691-21.
- 777 33. Pedregosa F, Varoquaux G, Gramfort A, Michel V, Thirion B, Grisel O, et al. Scikit-learn: Machine  
778 Learning in Python. *Journal of Machine Learning Research*. 2011;12:2825–30.
- 779 34. Geurts P, Ernst D, Wehenkel L. Extremely Randomized Trees. *Machine Learning*. 2006;63(1):3–42.
- 780 35. Lundberg SM, Lee S. A Unified Approach to Interpreting Model Predictions. In: 31st Conference on  
781 Neural Information Processing Systems (NIPS 2017 [Internet]. Long Beach; 2017. Available from:  
782 <http://papers.nips.cc/paper/7062-a-unified-approach-to-interpreting-model-predictions.pdf>.
- 783 36. Benavoli A, Corani G, Demšar J, Zaffalon M. Time for a Change: a Tutorial for Comparing Multiple  
784 Classifiers Through Bayesian Analysis. *Journal of Machine Learning Research*. 2017;18(77):1–36.
- 785 37. Rudar J, Porter TM, Wright M, Golding GB, Hajibabaei M. LANDMark: An ensemble approach to the  
786 supervised selection of biomarkers in high-throughput sequencing data. *BMC Bioinformatics*.  
787 2022;Forthcoming.
- 788 38. Elshahed MS, Miron A, Aprotosoai AC, Farag MA. Pectin in diet: Interactions with the human  
789 microbiome, role in gut homeostasis, and nutrient-drug interactions. *Carbohydrate Polymers*.  
790 2021;255:117388.
- 791 39. Kim CC, Healey GR, Kelly WJ, Patchett ML, Jordens Z, Tannock GW, et al. Genomic insights from  
792 *Monoglobus pectinilyticus*: a pectin-degrading specialist bacterium in the human colon. *ISME J*.  
793 2019 Jun;13(6):1437–56.
- 794 40. Bacaro G, Ricotta C, Mazzoleni S. Measuring beta-diversity from taxonomic similarity. *Journal of*  
795 *Vegetation Science*. 2007;18(6):793–8.
- 796 41. Wildi O. Evaluating the Predictive Power of Ordination Methods in Ecological Context.  
797 *Mathematics* [Internet]. 2018;6(12). Available from: <https://www.mdpi.com/2227-7390/6/12/295>
- 798 42. Leite MFA, Kuramae EE. You must choose, but choose wisely: Model-based approaches for  
799 microbial community analysis. *Soil Biology and Biochemistry*. 2020;151:108042.

- 800 43. Touw WG, Bayjanov JR, Overmars L, Backus L, Boekhorst J, Wels M, et al. Data mining in the Life  
801 Sciences with Random Forest: a walk in the park or lost in the jungle? *Brief Bioinform.*  
802 2012;14(3):315–26.
- 803 44. McKnight DT, Huerlimann R, Bower DS, Schwarzkopf L, Alford RA, Zenger KR. Methods for  
804 normalizing microbiome data: An ecological perspective. *Methods in Ecology and Evolution.*  
805 2019;10(3):389–400.
- 806 45. Weiss S, Xu ZZ, Peddada S, Amir A, Bittinger K, Gonzalez A, et al. Normalization and microbial  
807 differential abundance strategies depend upon data characteristics. *Microbiome.* 2017;5(27).
- 808 46. Duncan K, Carey-Ewend K, Vaishnava S. Spatial analysis of gut microbiome reveals a distinct  
809 ecological niche associated with the mucus layer. *medRxiv.* 2021 Jan 1;13(1):1874815.
- 810 47. Gloor GB, Wu JR, Pawlowsky-Glahn V, Egozcue JJ. It's all relative: analyzing microbiome data as  
811 compositions. *Ann Epidemiol.* 2016 May;26(5):322–9.
- 812 48. Tsagkrasoulis D, Montana G. Random forest regression for manifold-valued responses. *Pattern  
813 Recognition Letters.* 2018;101:6–13.
- 814 49. Kobak D, Linderman GC. Initialization is critical for preserving global data structure in both t-SNE  
815 and UMAP. *Nature Biotechnology.* 2021 Feb 1;39(2):156–7.
- 816 50. Ayesha S, Hanif MK, Talib R. Overview and comparative study of dimensionality reduction  
817 techniques for high dimensional data. *Information Fusion.* 2020;59:44–58.
- 818 51. Koul N, Manvi SS. Machine-Learning Algorithms for Feature Selection from Gene Expression Data.  
819 In: Srinivasa KG, Siddesh GM, Manisekhar SR, editors. *Statistical Modelling and Machine Learning  
820 Principles for Bioinformatics Techniques, Tools, and Applications [Internet].* Singapore: Springer  
821 Singapore; 2020. p. 151–61. Available from: [https://doi.org/10.1007/978-981-15-2445-5\\_10](https://doi.org/10.1007/978-981-15-2445-5_10)
- 822 52. Schloss PD. Amplicon Sequence Variants Artificially Split Bacterial Genomes into Separate Clusters.  
823 *mSphere.* 2021 Aug 25;6(4):e0019121.
- 824 53. Edgar RC. UCHIME2: Improved chimera detection for amplicon sequences. *bioRxiv [Internet].*  
825 2016; Available from: <https://www.drive5.com/uchime/>
- 826 54. Kuncheva LI, Rodriguez JJ. Classifier ensembles with a random linear oracle. *IEEE Transactions on  
827 Knowledge and Data Engineering.* 2007;19(4):500–8.
- 828 55. Callahan BJ, McMurdie PJ, Holmes SP. Exact sequence variants should replace operational  
829 taxonomic units in marker-gene data analysis. *The ISME Journal.* 2017;11:2639–43.
- 830 56. Valente G, Castellanos AL, Hausfeld L, Martino FD, Formisano E. Cross-validation and permutations  
831 in MVPA: Validity of permutation strategies and power of cross-validation schemes. *NeuroImage.*  
832 2021;238:118145.
- 833 57. Mentch L, Zhou S. Randomization as Regularization: A Degrees of Freedom Explanation for  
834 Random Forest Success. *Journal of Machine Learning Research.* 2020;21:171:1-171:36.



835 58. Wang C, Feng L, Qi Y. Explainable deep learning predictions for illness risk of mental disorders in  
836 Nanjing, China. *Environmental Research*. 2021;202:111740.

837 **Additional Files**

838 Additional File 1 – Supplementary Figures 1 to 4

839 Additional File 2 – Supplementary Table 1

840 Additional File 3 – Raw ESV Table, Taxonomic Assignments, and Code
